# Supplementary material
Source: PubMed Central journal article supplement (PMC2861420)

# Supporting Information

## **“Carbonyl Propargylation from the Alcohol or Aldehyde Oxidation Level Employing 1,3-Enynes as Surrogates to Preformed Allenyl Metal Reagents: A Ruthenium Catalyzed C-C Bond Forming Transfer Hydrogenation”**

Ryan L. Patman, Vanessa M. Williams, John F. Bower and Michael J. Krische\*

University of Texas at Austin  
Department of Chemistry and Biochemistry  
Austin, TX 78712  
USA

### Table of Contents

|                                                                                         |    |
|-----------------------------------------------------------------------------------------|----|
| General Experimental Details                                                            | 2  |
| Experimental Procedures and Spectroscopic Data for Adducts <b>3a-3u</b>                 | 3  |
| Procedures for the Propargylation of <b>4a-4c</b> Employing <i>i</i> -PrOH as Reductant | 46 |
| Experimental Details for Mechanistic Studies                                            | 49 |

**General Experimental Details.** All reactions were run under an atmosphere of argon, unless otherwise indicated. Anhydrous solvents were transferred *via* oven-dried syringe. Reaction tubes were flame-dried and cooled under a stream of nitrogen. Reaction tubes were purchased from Fisher Scientific (catalog number 14-959-35C). THF was passed through a column of Al<sub>2</sub>O<sub>3</sub> and sparged with argon immediately prior to use. Dppf and RuHCl(CO)(PPh<sub>3</sub>)<sub>3</sub> were used as received from Strem Chemicals. Substrates **1a-1g** were prepared in analogy with the procedure of Sonogashira and coworkers.<sup>1</sup> Commercially available alcohols were used as received. Commercially available aldehydes were purified *via* distillation or recrystallization prior to use. Reactions were monitored by thin-layer chromatography and products visualized with anisaldehyde stain. Analytical thin-layer chromatography (TLC) was carried out using 0.2-mm commercial silica gel plates (DC-Fertigplatten Kieselgel 60 F<sub>254</sub>). Preparative column chromatography employing silica gel was performed according to the method of Still.<sup>2</sup> Solvents for chromatography are listed as volume/volume ratios. Infrared spectra were recorded on a Perkin-Elmer 1600 spectrometer. High-resolution mass spectra (HRMS) were obtained on a Karatos MS9 and are reported as m/z (relative intensity). Accurate masses are reported for the molecular ion [M+H]<sup>+</sup> or a suitable fragment ion. Proton nuclear magnetic resonance (<sup>1</sup>H NMR) spectra were recorded with a Varian Gemini (400 MHz or 300MHz) spectrometer. Chemical shifts are reported in delta (δ) units, parts per million (ppm) downfield from trimethylsilane. Coupling constants are reported in Hertz (Hz). Where mixtures of isomers (*e.g.* diastereomers) have been characterized together, integrals are normalized to the major isomer. Carbon-13 nuclear magnetic resonance (<sup>13</sup>C NMR) spectra were recorded with a Varian Gemini 300 (75 MHz) or 400 (100 MHz) spectrometer. Chemical shifts are reported in delta (δ) units, ppm relative to the center of the triplet at 77.0 ppm for deuteriochloroform. <sup>13</sup>C NMR spectra were routinely run with broadband decoupling. Compound numbers used in the experimental section correspond to those employed in the main paper.

---

<sup>1</sup> K. Sonogashira, Y. Tohada, N. Hagihara, *Tetrahedron Lett.* **1975**, *16*, 4467-4470.

<sup>2</sup> W. C. Still, M. Kahn, A. Mitra, *J. Org. Chem.* **1978**, *43*, 2923-2925.

### **Experimental Procedures and Spectroscopic Data for Adducts 3a-3u**

**General Procedure A for the Coupling of 1a to Alcohols:** To a re-sealable reaction tube containing a magnetic stirrer, was added RuHCl(CO)(PPh<sub>3</sub>)<sub>3</sub> (14.3 mg, 0.015 mmol, 5 mol%), dppf (8.3 mg, 0.015 mmol, 5 mol%), and the corresponding alcohol (0.300 mmol, 100 mol%). THF (0.15 mL, 2.0 M concentration with respect to the alcohol) and **1a** (76.9 mg, 0.600 mmol, 200 mol%) were added and the mixture was heated at 95 °C for the time stated. The mixture was then concentrated *in vacuo* and purified by flash column chromatography (SiO<sub>2</sub>), under the conditions noted, to afford the corresponding product.

**General Procedure B for the Coupling of 2b to 1,3-Enynes:** To a re-sealable reaction tube containing a magnetic stirrer, was added RuHCl(CO)(PPh<sub>3</sub>)<sub>3</sub> (14.3 mg, 0.015 mmol, 5 mol%), dppf (8.3 mg, 0.015 mmol, 5 mol%), *m*-NO<sub>2</sub>BzOH (2.5 mg, 0.015 mmol, 5 mol%), and **2b** (31 μL, 0.300 mmol, 100 mol%). THF (0.15 mL, 2.0 M concentration with respect to the alcohol) and the corresponding 1,3-enyne (0.600 mmol, 200 mol%) were added and the mixture was heated at 95 °C for the time stated. The mixture was then concentrated *in vacuo* and purified by flash column chromatography (SiO<sub>2</sub>), under the conditions noted, to afford the corresponding product.

**General Procedure C for the Coupling of 1a to Aldehydes:** To a re-sealable reaction tube containing a magnetic stirrer, was added RuHCl(CO)(PPh<sub>3</sub>)<sub>3</sub> (14.3 mg, 0.015 mmol, 5 mol%), dppf (8.3 mg, 0.015 mmol, 5 mol%), and the corresponding aldehyde (0.300 mmol, 100 mol%). THF (0.15 mL, 2.0 M concentration with respect to the alcohol), **1a** (76.9 mg, 0.600 mmol, 200 mol%), and isopropanol (70 μL, 0.900 mmol, 300 mol%) were added and the mixture was heated at 90 °C for the time stated. The mixture was then concentrated *in vacuo* and purified by flash column chromatography (SiO<sub>2</sub>), under the conditions noted, to afford the corresponding product.

**2-Methyl-1-(4-nitrophenyl)-4-phenylbut-3-yn-1-ol (3a)**

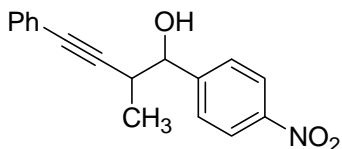

**Procedure A (via alcohol 2a):** After heating the reaction at 95 °C for 15 hours the mixture was concentrated *in vacuo* and purified by flash column chromatography (SiO<sub>2</sub>, PhMe) to afford the title compound (55 mg, 65%, 1:1 d.r.) as a yellow oil.

**<sup>1</sup>H NMR** (400 MHz, CDCl<sub>3</sub>): 8.23 (d, *J* = 2.0 Hz, 2H), 8.22 (d, *J* = 2.0 Hz, 2H), 8.21 (d, *J* = 2.0 Hz, 2H), 8.20 (d, *J* = 2.0 Hz, 2H), 8.18-7.18 (m, 10H), 4.90 (dd, *J* = 6.4, 3.9 Hz, 1H), 4.77 (dd, *J* = 6.4, 3.9 Hz, 1H), 3.13-2.98 (m, 2H), 2.73 (d, *J* = 3.9 Hz, 1H), 2.57 (d, *J* = 3.9 Hz, 1H), 1.25 (d, *J* = 6.4 Hz, 3H), 1.21 (d, *J* = 6.4 Hz, 3H).

**<sup>13</sup>C NMR** (100 MHz, CDCl<sub>3</sub>): 148.9, 148.7, 147.5, 147.4, 131.6, 131.5, 128.3 (2 signals), 128.2, 127.4, 123.4, 123.2, 122.8, 122.6, 89.8, 88.9, 84.5, 83.9, 76.3, 75.7, 35.9, 35.0, 17.2, 15.8 (only 24 signals observed).

**HRMS** (CI) Calcd. for C<sub>17</sub>H<sub>16</sub>NO<sub>3</sub> [M+H]<sup>+</sup>: 282.1132, Found: 282.1130.

**FTIR** (neat): 3538, 2979, 2935, 1600, 1519, 1490, 1443, 1347, 1192, 1108, 1038, 913, 846, 757, 693 cm<sup>-1</sup>.

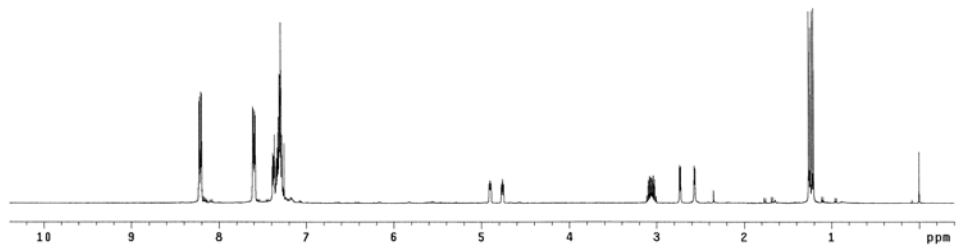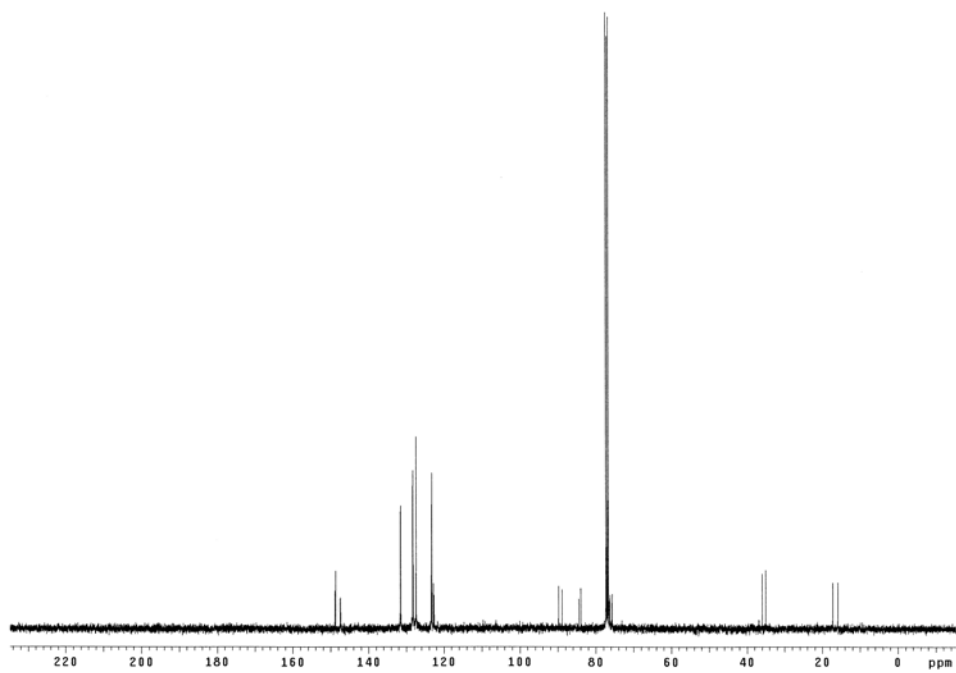

## 2-Methyl-1,4-diphenyl-but-3-yn-1-ol (3b)<sup>3</sup>

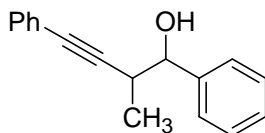

**Procedure A (via alcohol 2b):** After heating the reaction at 95 °C for 15 hours the mixture was concentrated *in vacuo* and purified by flash column chromatography (SiO<sub>2</sub>, PhMe) to afford the title compound (57 mg, 81%, 1:1 d.r.) as a pale yellow oil.

**<sup>1</sup>H NMR** (400 MHz, CDCl<sub>3</sub>): 7.43-7.25 (m, 20H), 4.77 (dd, *J* = 3.8, 3.4 Hz, 1H), 4.58 (dd, *J* = 3.8, 3.4 Hz, 1H), 3.08-2.99 (m, 2H), 2.64 (d, *J* = 3.8 Hz, 1H), 2.37 (d, *J* = 3.4 Hz, 1H), 1.22-1.16 (m, 6H).

**<sup>13</sup>C NMR** (100 MHz, CDCl<sub>3</sub>): 141.5, 141.4, 131.6, 131.5, 128.2 (2 signals), 128.1, 128.0 (2 signals), 127.9, 127.8, 127.7, 126.7, 126.5, 123.3, 123.1, 91.1, 90.5, 83.6, 83.2, 77.6, 76.6, 36.0, 34.0, 17.3, 15.9.

**HRMS** (CI) Calcd. for C<sub>17</sub>H<sub>17</sub>O [M+H]<sup>+</sup>: 237.1279, Found: 237.1282.

**FTIR** (neat): 3419, 3030, 2976, 2932, 1950, 1598, 1491, 1372, 1196, 1026, 913, 756, 693, 546 cm<sup>-1</sup>.

*The spectroscopic properties of this compound were consistent with the data available in the literature.*<sup>3</sup>

<sup>3</sup> M. Ishiguro, N. Ikeda, H. Yamamoto, *J. Org. Chem.* **1982**, *47*, 2225-2227.

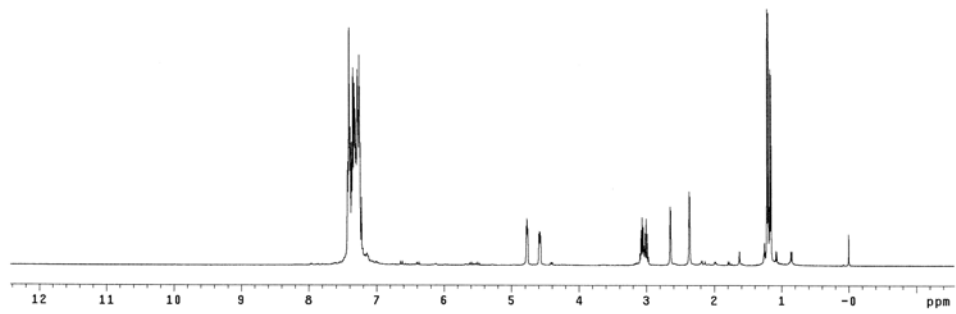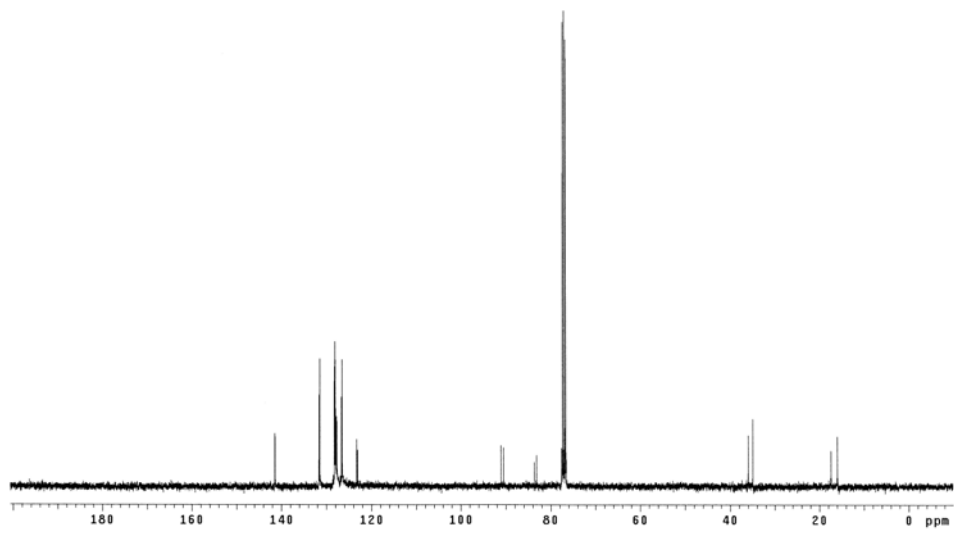

**1-(4-Methoxyphenyl)-2-methyl-4-phenylbut-3-yn-1-ol (3c)**

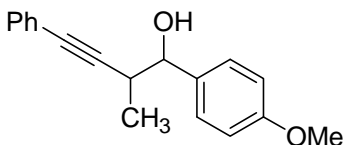

**Procedure A (via alcohol 2c):** After heating the reaction at 95 °C for 15 hours the mixture was concentrated *in vacuo* and purified by flash column chromatography (SiO<sub>2</sub>, PhMe) to afford the title compound (65 mg, 81%, 1:1 d.r.) as a pale yellow oil.

**<sup>1</sup>H NMR** (400 MHz, CDCl<sub>3</sub>): 7.43-7.24 (m, 14H), 6.90-6.79 (m, 4H), 4.71 (dd, *J* = 3.8, 3.4 Hz, 1H), 4.54 (dd, *J* = 3.8, 3.4 Hz, 1H), 3.80 (s, 6H), 3.06-2.96 (m, 2H), 2.62 (d, *J* = 3.8 Hz, 1H), 2.30 (d, *J* = 3.4 Hz, 1H), 1.21 (d, *J* = 6.8 Hz, 3H), 1.15 (d, *J* = 6.8 Hz, 3H).

**<sup>13</sup>C NMR** (100 MHz, CDCl<sub>3</sub>): 159.3, 159.1, 133.8, 133.6, 131.6, 131.5, 128.2, 128.1, 128.0, 127.9, 127.7, 123.4, 123.3, 113.6, 113.4, 91.2, 90.7, 83.5, 83.1, 77.6, 76.5, 55.2 (2 signals), 36.0, 35.0, 30.0, 17.4, 16.2.

**HRMS** (CI) Calcd. for C<sub>18</sub>H<sub>19</sub>O<sub>2</sub> [M+H]<sup>+</sup>: 267.1385, Found: 267.1390.

**FTIR** (neat): 3429, 2932, 2836, 1612, 1513, 1490, 1442, 1372, 1303, 1249, 1175, 1034, 831, 757, 693 cm<sup>-1</sup>.



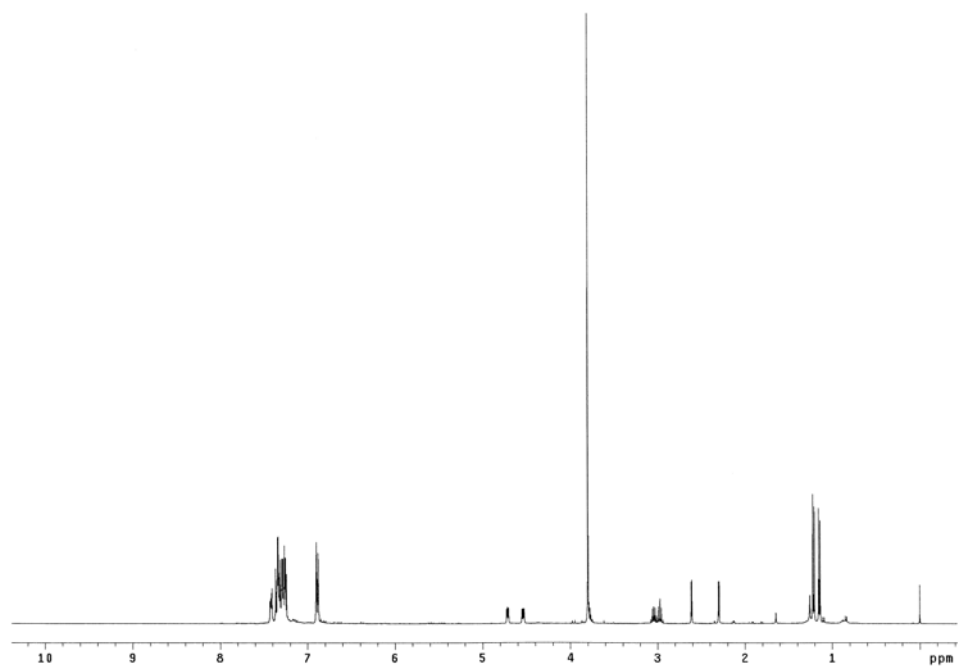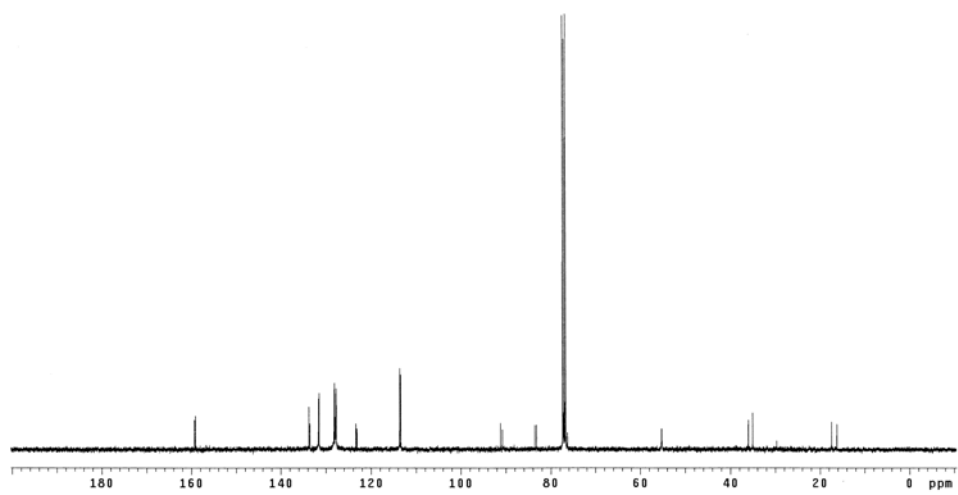

**1-(2-Methoxyphenyl)-2-methyl-4-phenylbut-3-yn-1-ol (3d)**

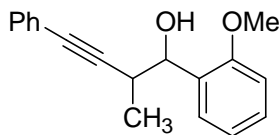

**Procedure A (via alcohol 2d):** After heating the reaction at 95 °C for 15 hours the mixture was concentrated *in vacuo* and purified by flash column chromatography (SiO<sub>2</sub>, PhMe) to afford the title compound (73 mg, 91%, 2:1 d.r.) as a pale yellow oil.

**<sup>1</sup>H NMR** (400 MHz, CDCl<sub>3</sub>): 7.46-7.38 (m, 3H), 7.31-7.23 (m, 7.5H), 7.01-6.96 (m, 1.5H) 6.89 (d, *J* = 8.2 Hz, 1.5H), 4.98-4.91 (m, 1.5H), 3.84 (s, 4.5H), 3.25-3.12 (m, 1.5H), 2.89 (s, 1.5H), 1.25 (d, *J* = 7.2 Hz, 4.5H).

**<sup>13</sup>C NMR** (100 MHz, CDCl<sub>3</sub>): 156.5, 156.4, 132.0 (2 signals), 130.1, 129.4, 128.6, 128.5 (2 signals), 128.1 (2 signals), 127.8, 127.6, 127.4, 123.6, 123.4, 120.6, 120.4, 110.3 (2 signals) 92.0, 91.0, 83.1, 82.6, 74.0, 72.8, 55.2 (2 signals), 34.7, 33.0, 18.1, 16.0.

**HRMS** (CI) Calcd. for C<sub>18</sub>H<sub>19</sub>O<sub>2</sub> [M+H]<sup>+</sup>: 267.1385, Found: 267.1389.

**FTIR** (neat): 3448, 2935, 2837, 1684, 1600, 1491, 1463, 1289, 1241, 1189, 1103, 1028, 986, 912, 786, 755, 693, 542 cm<sup>-1</sup>.

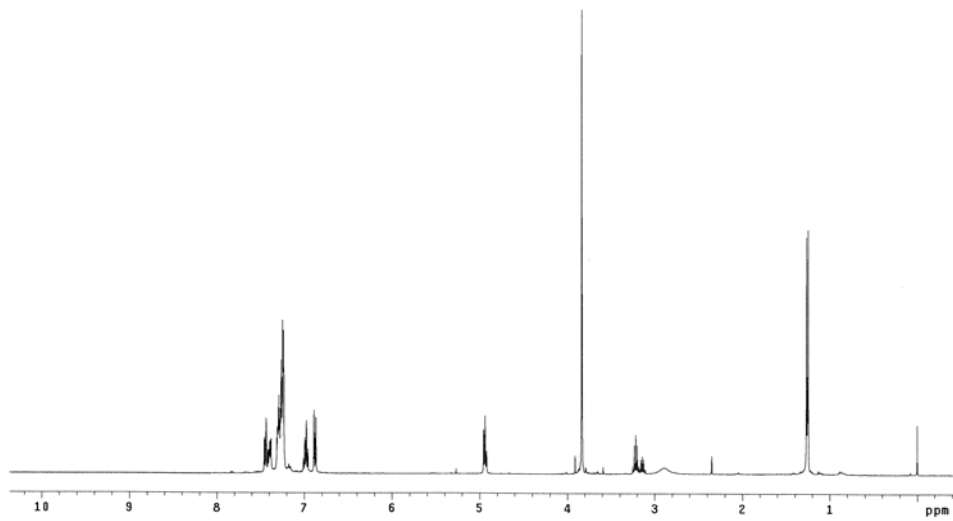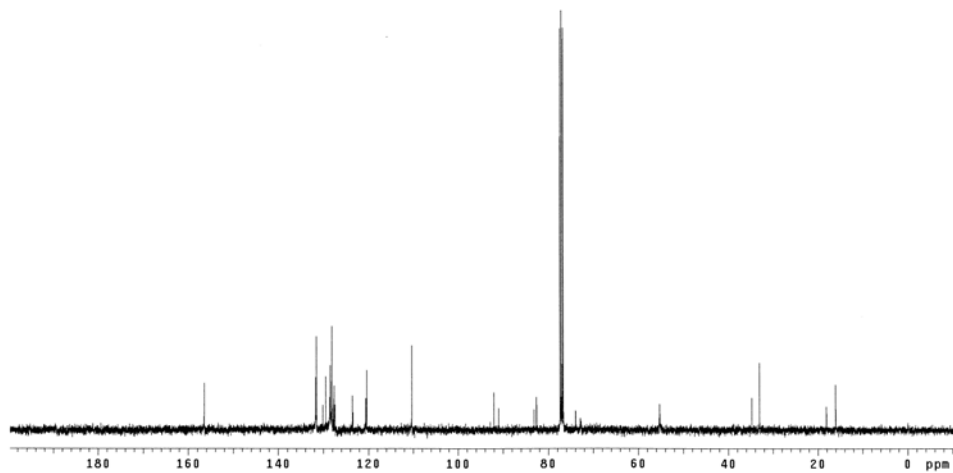

**1-Benzo[1,3]dioxol-5-yl-2-methyl-4-phenylbut-3-yn-1-ol (3e)**

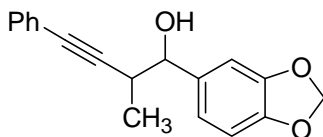

**Procedure A (via alcohol 2e):** After heating the reaction at 95 °C for 15 hours the mixture was concentrated *in vacuo* and purified by flash column chromatography (SiO<sub>2</sub>, PhMe) to afford the title compound (70 mg, 83%, 2:1 d.r.) as a yellow oil.

**<sup>1</sup>H NMR** (400 MHz, CDCl<sub>3</sub>): 7.48-7.24 (m, 7.5H), 6.99 (d, *J* = 1.7 Hz, 0.5H), 6.94 (d, *J* = 1.7 Hz, 1H), 6.91-6.83 (m, 1.5H), 6.80 (s, 1H), 6.78 (s, 0.5H), 5.96 (s, 3H), 4.71 (dd, *J* = 5.8, 3.1 Hz, 0.5H), 4.51 (dd, *J* = 5.8, 3.1 Hz, 1H), 3.05-2.92 (m, 1.5H), 2.58 (d, *J* = 3.1 Hz, 1H), 2.21 (d, *J* = 3.1 Hz, 0.5H), 1.22 (d, *J* = 7.2 Hz, 1.5H), 1.16 (d, *J* = 7.2 Hz, 3H).

**<sup>13</sup>C NMR** (100 MHz, CDCl<sub>3</sub>): 147.7, 147.5, 147.3, 136.1, 135.6, 135.4, 131.7, 131.6, 129.0, 128.6, 128.3, 128.2, 128.1, 123.3, 123.1, 120.4, 120.1, 107.9, 107.8, 106.9, 101.0, 91.0, 90.5, 83.7, 83.3, 77.6, 76.5, 36.1, 35.1, 17.4, 16.1 (only 31 signals observed).

**HRMS** (CI) Calcd. for C<sub>18</sub>H<sub>17</sub>O<sub>3</sub> [M+H]<sup>+</sup>: 281.1172, Found: 281.1178.

**FTIR** (neat): 3450, 2896, 1696, 1604, 1489, 1471, 1443, 1247, 1038, 935, 811, 757, 693 cm<sup>-1</sup>.

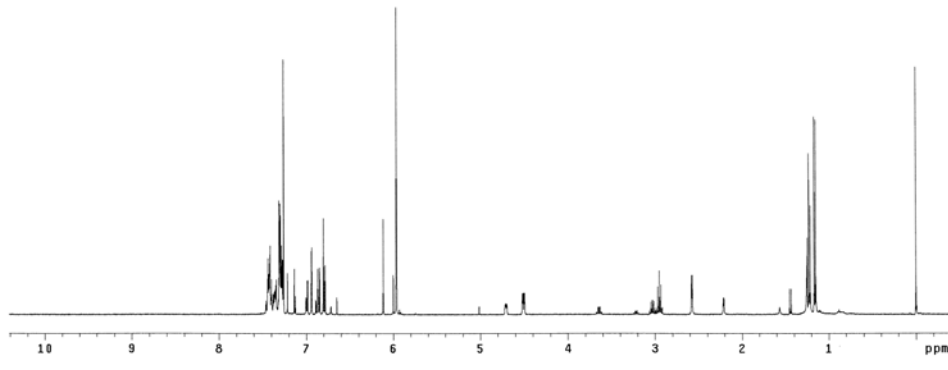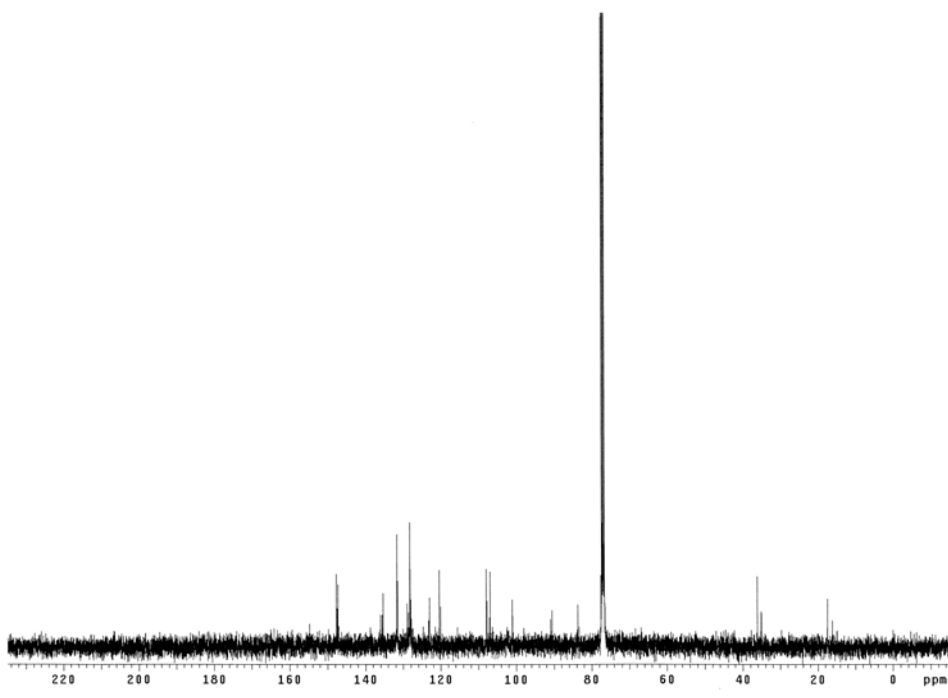

**1-(4-Bromophenyl)-2-methyl-4-phenylbut-3-yn-1-ol (3f)**

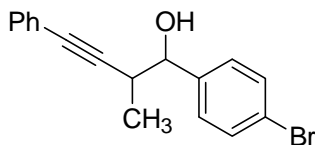

**Procedure A (via alcohol 2f):** After heating the reaction at 95 °C for 16 hours the mixture was concentrated *in vacuo* and purified by flash column chromatography (SiO<sub>2</sub>, PhMe) to afford the title compound (69 mg, 73%, 1:1 d.r.) as a pale yellow oil.

**<sup>1</sup>H NMR** (400 MHz, CDCl<sub>3</sub>): 7.50-7.46 (m, 4H), 7.41-7.38 (m, 2H), 7.34-7.25 (m, 12H), 4.72 (dd, *J* = 5.5, 3.5 Hz, 1H), 4.55 (dd, *J* = 6.5, 4.0 Hz, 1H), 3.06-2.98 (m, 1H), 2.95 (dq, *J* = 4.0, 4.0 Hz, 1H), 2.64 (d, *J* = 4.0 Hz, 1H), 2.40 (d, *J* = 3.5 Hz, 1H), 1.20-1.16 (m, 6H).

**<sup>13</sup>C NMR** (100 MHz, CDCl<sub>3</sub>): 140.8, 140.7, 131.9, 131.8, 131.6, 131.4, 129.3, 128.6 (2 signals), 128.5 (2 signals), 128.4, 128.2, 123.2, 122.1, 121.8, 90.8, 90.2, 84.3, 83.8, 77.1, 76.2, 36.2, 35.2, 17.5, 16.2.

**HRMS** (ESI) Calcd. for C<sub>17</sub>H<sub>16</sub>O<sup>79</sup>Br [M+H]<sup>+</sup>: 315.0385, Found: 315.0379.

**FTIR** (neat): 3415, 2976, 2876, 1594, 1488, 1442, 1404, 1071, 1010 cm<sup>-1</sup>.

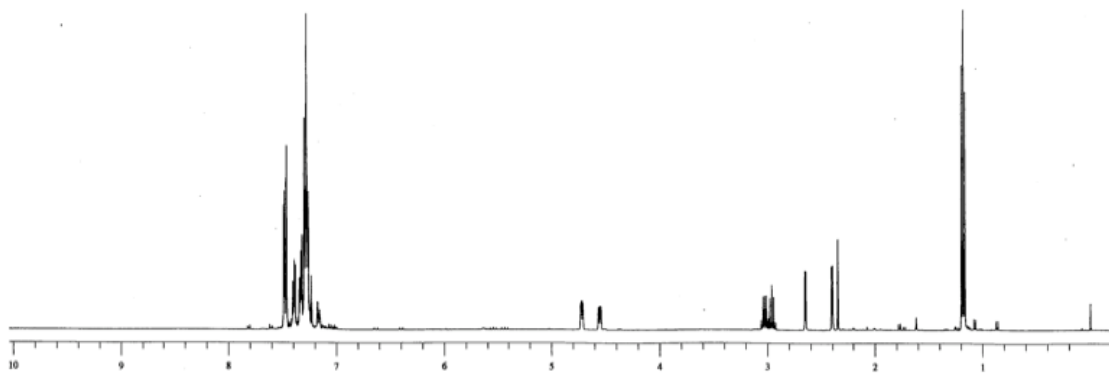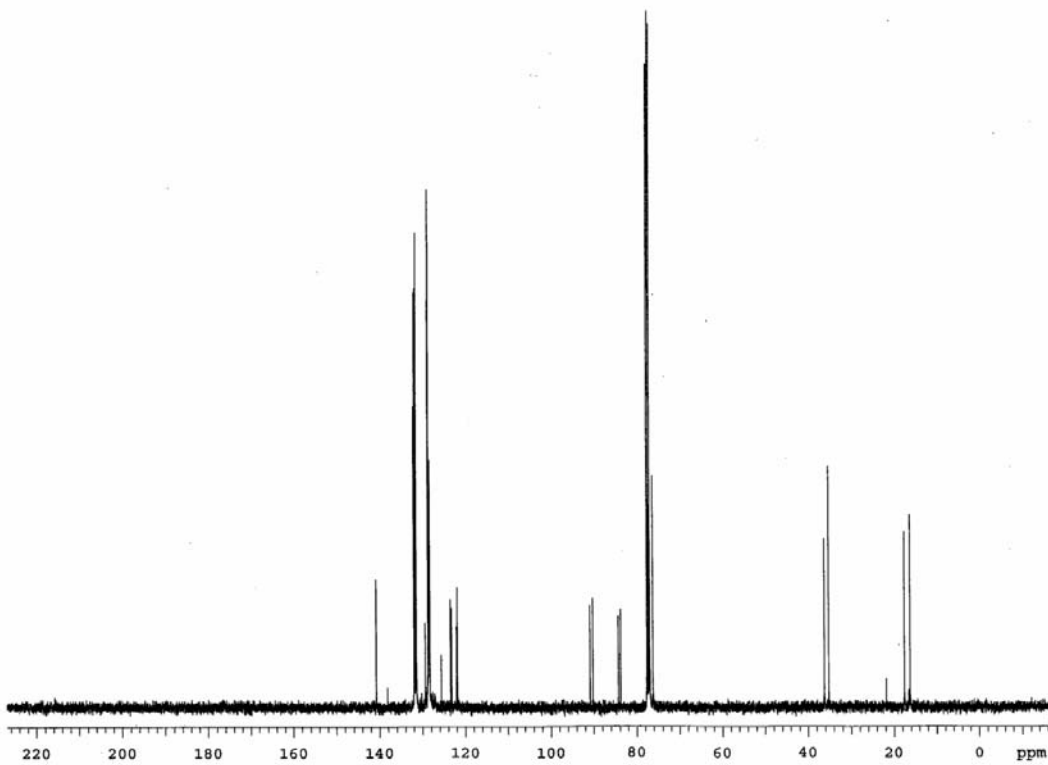

**1-Furan-2-yl-2-methyl-4-phenylbut-3-yn-1-ol (3g)**

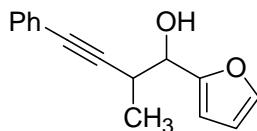

**Procedure A (via alcohol 2g):** After heating the reaction at 95 °C for 15 hours the mixture was concentrated *in vacuo* and purified by flash column chromatography (SiO<sub>2</sub>, PhMe) to afford the title compound (48 mg, 71%, 1.5:1 d.r.) as a pale yellow oil.

**<sup>1</sup>H NMR** (400 MHz, CDCl<sub>3</sub>): 7.41-7.26 (m, 8.3H), 6.42-6.36 (m, 5H), 4.76 (t, *J* = 6.2 Hz, 1H), 4.62 (t, *J* = 6.6 Hz, 0.67H), 3.27-3.19 (m, 1.67H), 2.51 (d, *J* = 6.6 Hz, 1H), 2.28 (d, *J* = 6.2 Hz, 0.67H), 1.29 (d, *J* = 6.5 Hz, 3H), 1.25 (d, *J* = 6.6 Hz, 2H).

**<sup>13</sup>C NMR** (100 MHz, CDCl<sub>3</sub>): 154.4, 154.2, 141.9, 141.8, 131.7, 128.0, 127.8, 123.3, 123.1, 110.2, 107.3, 107.1, 90.2, 89.9, 83.0, 82.6, 71.4, 71.3, 33.5, 33.0, 16.7, 16.3 (only 22 signals were observed).

**HRMS** (CI) Calcd. for C<sub>15</sub>H<sub>15</sub>O<sub>2</sub> [M+H]<sup>+</sup>: 227.1072, Found: 227.1074.

**FTIR** (neat): 3421, 2933, 2361, 1699, 1653, 1676, 1558, 1540, 1506, 1490, 1457, 1395, 1148, 1010, 918, 884, 757, 692, 598 cm<sup>-1</sup>.



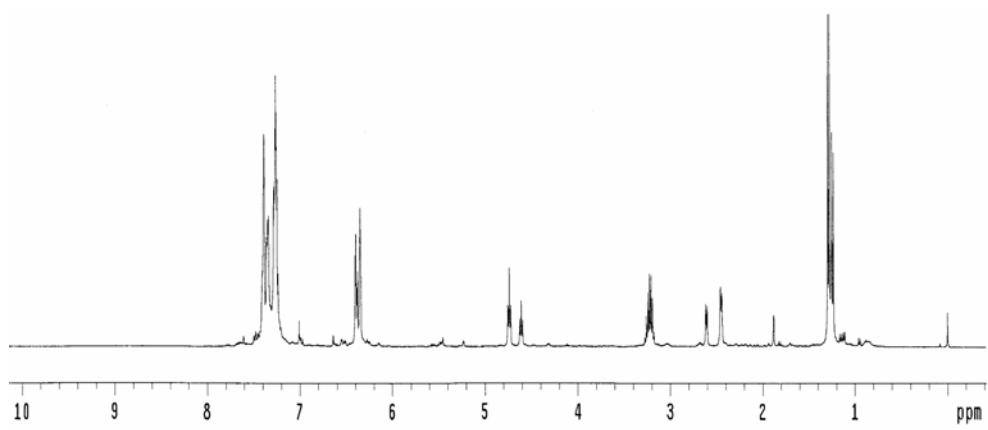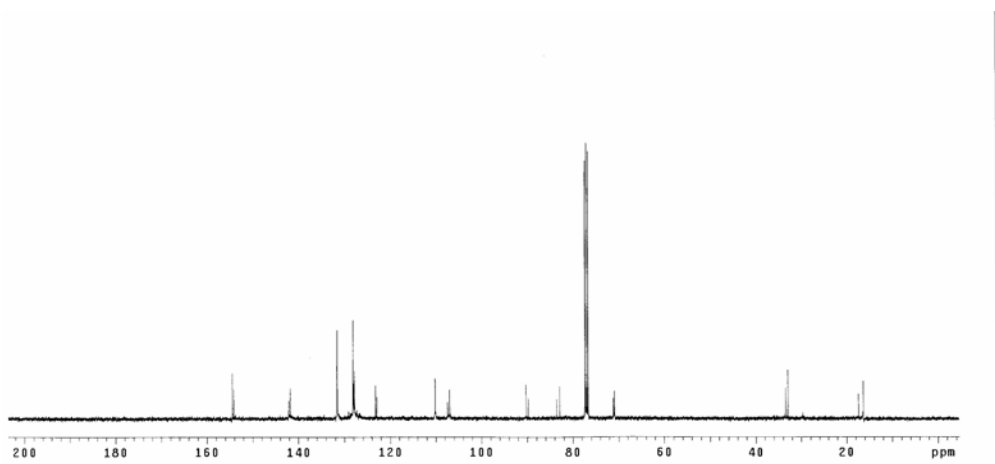

**2-Methyl-1-(1-methyl-1*H*-indol-2-yl)-4-phenylbut-3-yn-1-ol (3h)**

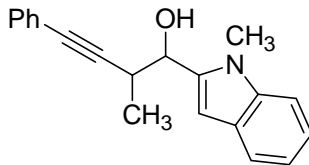

**Procedure A (via alcohol 2h):** After heating the reaction at 95 °C for 15 hours the mixture was concentrated *in vacuo* and purified by flash column chromatography (SiO<sub>2</sub>, PhMe) to afford the title compound (82 mg, 94%, 1:1 d.r.) as a yellow solid.

**<sup>1</sup>H NMR** (400 MHz, CDCl<sub>3</sub>): 7.61-7.01 (m, 18H), 6.68 (s, 1H), 6.60 (s, 1H), 4.87-4.81 (m, 1H), 4.76-4.07 (m, 1H), 3.78 (s, 3H), 3.74 (s, 3H), 3.40-3.31 (m, 1H), 3.27-3.22 (m, 1H), 2.56 (s, 1H), 2.21 (s, 1H), 1.41 (d, *J* = 7.2 Hz, 3H), 1.32 (d, *J* = 6.8 Hz, 3H).

**<sup>13</sup>C NMR** (100 MHz, CDCl<sub>3</sub>): 139.8, 139.1, 138.3, 132.1 (2 signals), 128.7, 128.2, 127.5, 123.3, 123.1, 122.3, 121.1, 120.0, 109.7, 101.1, 100.5, 91.0, 90.5, 84.3, 83.3, 70.5, 70.1, 33.5, 30.2, 18.4, 17.1 (only 26 signals were observed).

**HRMS** (CI) Calcd. for C<sub>20</sub>H<sub>20</sub>NO [M+H]<sup>+</sup>: 290.1545, Found: 290.1545.

**FTIR** (neat): 3429, 3055, 2973, 2934, 1681, 1598, 1532, 1490, 1316, 1233, 1173, 1139, 1110, 1070, 1027, 984, 945, 908, 788, 751, 735, 692 cm<sup>-1</sup>.

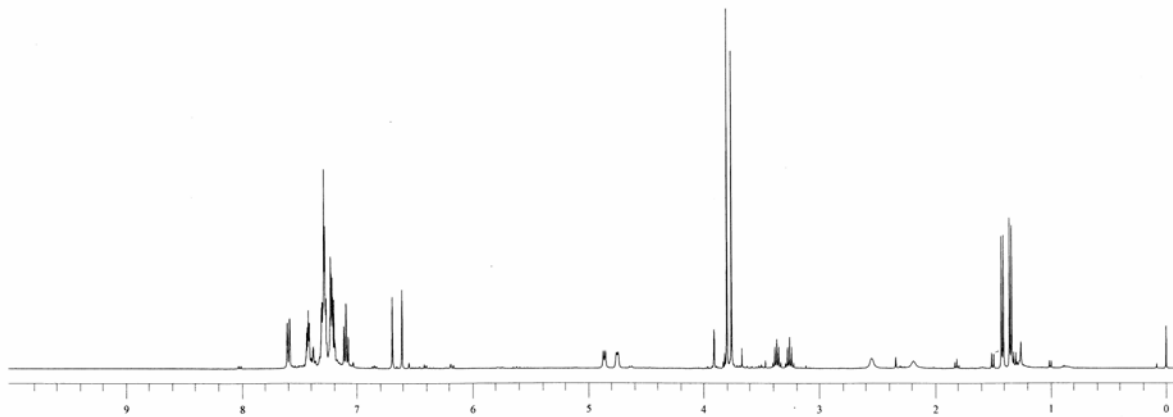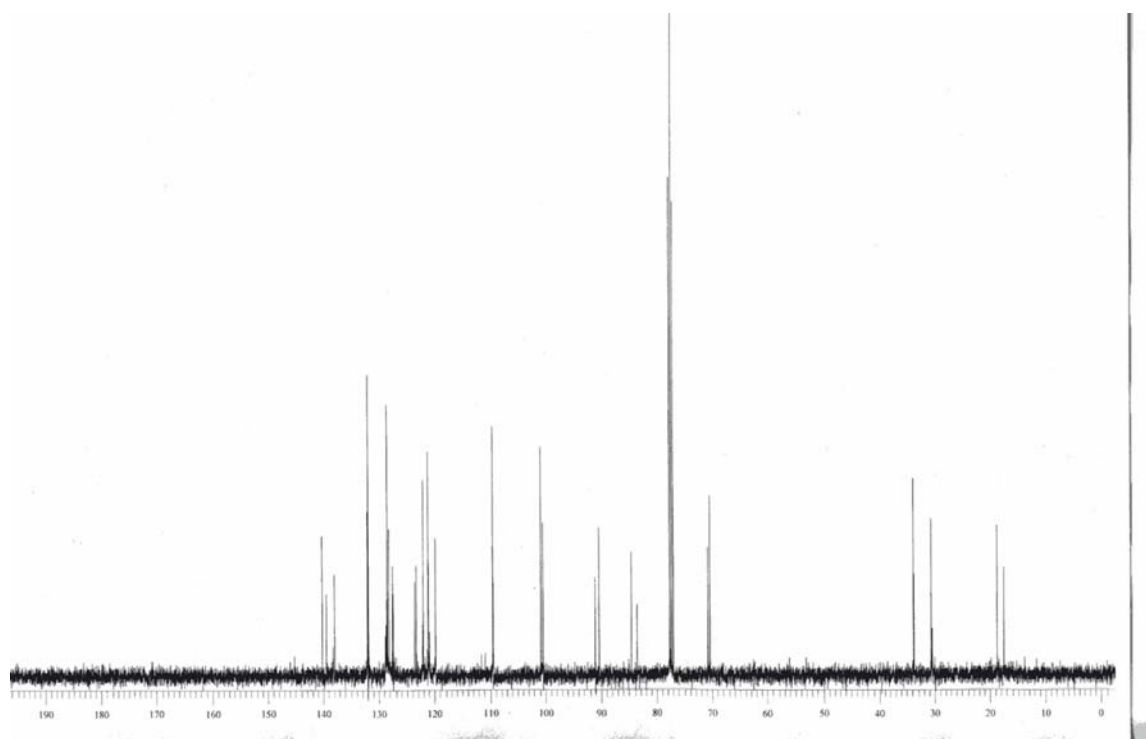

**1-(6-Bromopyridin-2-yl)-2-methyl-4-phenylbut-3-yn-1-ol (3i)**

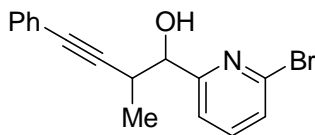

**Procedure A (via alcohol 2i):** After heating the reaction at 95 °C for 15 hours the mixture was concentrated *in vacuo* and purified by flash column chromatography (SiO<sub>2</sub>, PhMe) to afford the title compound (40 mg, 42%, 1.3:1 d.r.) as a pale yellow oil.

**<sup>1</sup>H NMR** (400 MHz, CDCl<sub>3</sub>): 7.60-7.51 (m, 1.75H), 7.50-7.39 (m, 3.5H), 7.36-7.31 (m, 3.5H), 7.30-7.26 (m, 5.25H), 4.80 (dd, *J* = 7.5, 5.5 Hz, 1H), 4.74-4.68 (m, 0.75H), 3.71 (dd, *J* = 7.5, 1.5 Hz, 1H), 3.53 (dd, *J* = 7.5, 1.5 Hz, 0.75H), 3.30-3.23 (m, 1H), 3.06-3.01 (m, 0.75H), 1.31 (dd, *J* = 5.5, 1.5 Hz, 5.25H).

**<sup>13</sup>C NMR** (100 MHz, CDCl<sub>3</sub>): 161.8, 161.5, 141.1, 140.9, 138.7, 138.4, 131.6, 131.5, 128.2, 128.0, 127.9, 127.1, 127.0, 123.2, 123.1, 120.8, 119.9, 90.7, 89.4, 84.0, 83.4, 75.8, 75.2, 34.7, 34.6, 16.8, 16.3 (only 27 signals were observed).

**HRMS** (CI) Calcd. for C<sub>16</sub>H<sub>15</sub><sup>79</sup>BrNO [M+H]<sup>+</sup>: 316.0337, Found: 316.0337.

**FTIR** (neat): 3423, 3055, 2976, 2933, 1583, 1556, 1490, 1439, 1408, 1307, 1217, 1158, 1128, 1054, 989, 913, 788, 757, 692 cm<sup>-1</sup>.

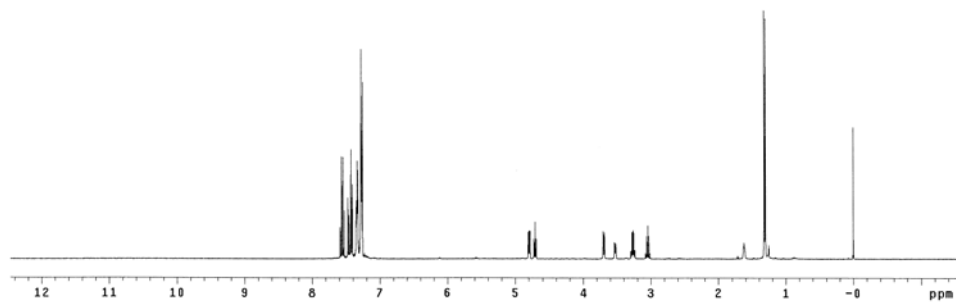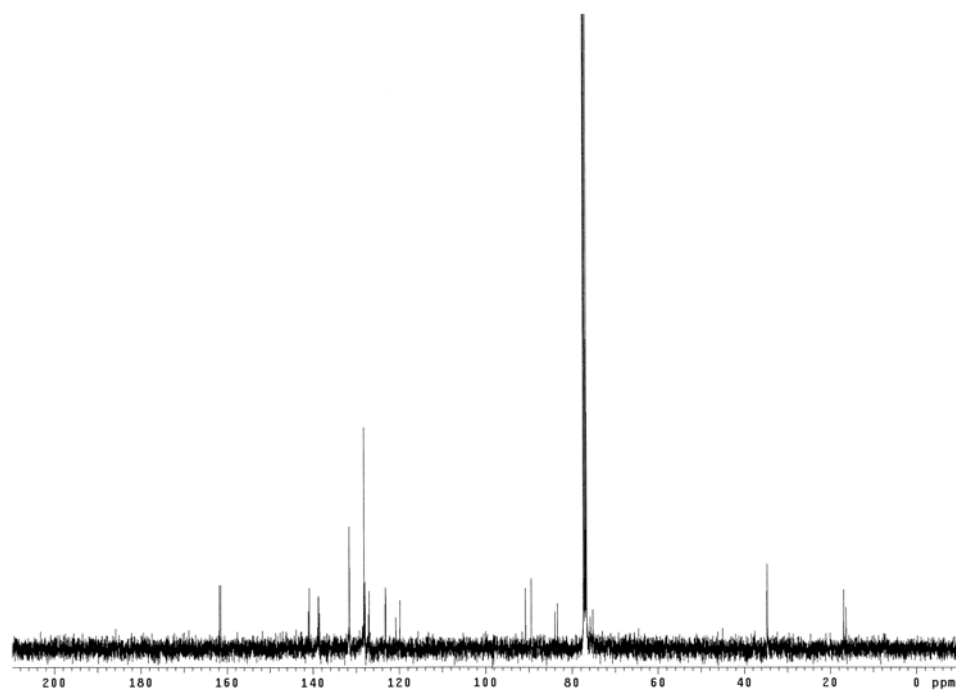

#### 4-Methyl-1,6-diphenylhex-1-en-5-yn-3-ol (3j)

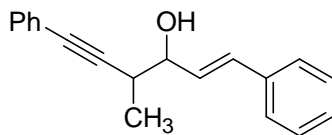

**Procedure A (via alcohol 2j):** After heating the reaction at 95 °C for 15 hours the mixture was concentrated *in vacuo* and purified by flash column chromatography (SiO<sub>2</sub>, PhMe) to afford the title compound (54 mg, 68%, 1:1 d.r.) as a pale yellow oil.

**<sup>1</sup>H NMR** (400 MHz, CDCl<sub>3</sub>): 7.43-7.23 (m, 20H), 6.71 (s, 1H), 6.67 (s, 1H), 6.38 (dd, *J* = 16.5, 6.3 Hz, 1H), 6.30 (dd, *J* = 15.7, 6.5 Hz, 1H), 4.32 (dd, *J* = 15.7, 4.8 Hz, 1H), 4.24 (dd, *J* = 16.5, 5.2 Hz, 1H), 3.04-2.89 (m, 2H), 2.24 (d, *J* = 4.8 Hz, 1H), 2.08 (d, *J* = 5.2 Hz, 1H), 1.32 (d, *J* = 7.2 Hz, 3H), 1.30 (d, *J* = 7.2 Hz, 3H).

**<sup>13</sup>C NMR** (100 MHz, CDCl<sub>3</sub>): 136.6, 136.5, 132.3, 132.2, 131.7 (2 signals), 129.5, 128.8, 128.6, 128.2 (2 signals), 128.0, 127.9, 127.8, 126.6, 123.3, 123.1, 90.5, 90.1, 83.6, 83.2, 75.8, 75.4, 34.5, 34.0, 17.1, 16.5 (only 27 signals were observed).

**HRMS** (CI) Calcd. for C<sub>19</sub>H<sub>19</sub>O [M+H]<sup>+</sup>: 263.1433, Found: 263.1436.

**FTIR** (neat): 3421, 3026, 2974, 2929, 1598, 1490, 1449, 1070, 1028, 966, 755, 692 cm<sup>-1</sup>.

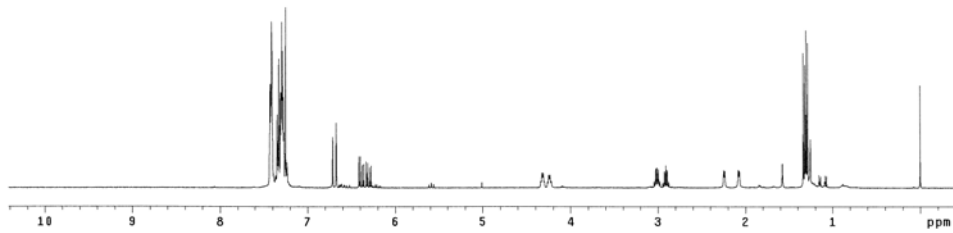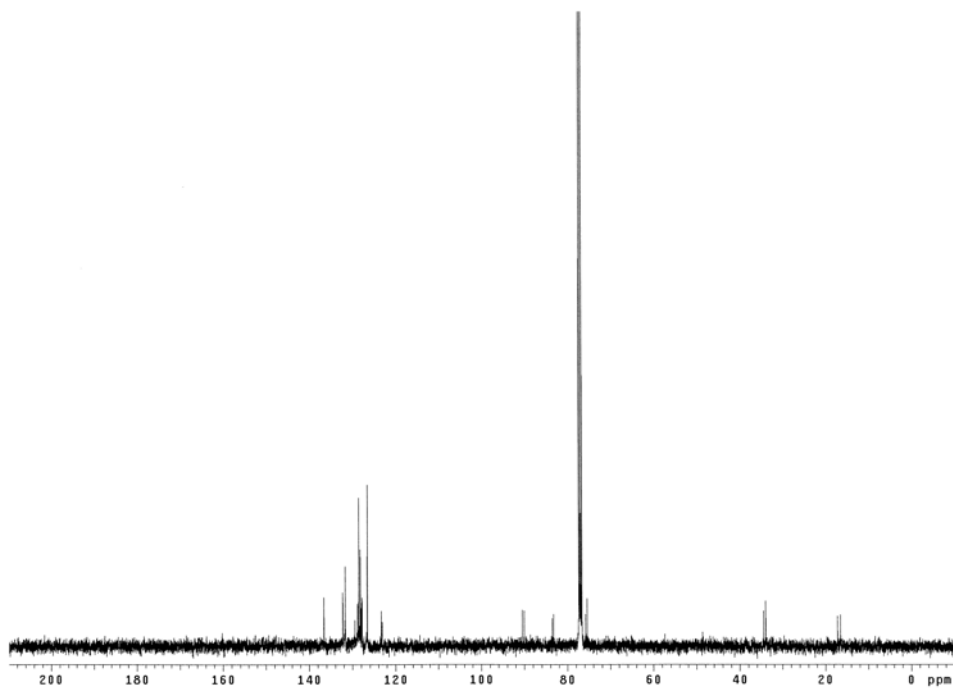

**3,6,10-Trimethyl-1-phenylundeca-5,9-dien-1-yn-4-ol (3k)**

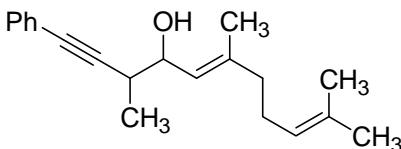

**Procedure A (via alcohol 2k):** After heating the reaction at 95 °C for 16 hours the mixture was concentrated *in vacuo* and purified by flash column chromatography (SiO<sub>2</sub>, PhMe) to afford the title compound (53 mg, 63%, 1.5:1 d.r.) as a colorless oil.

**<sup>1</sup>H NMR** (400 MHz, CDCl<sub>3</sub>): 7.44-7.38 (m, 3.32H), 7.30-7.26 (m, 4.98H), 5.39 (d, *J* = 8.5 Hz, 0.66H), 5.25 (d, *J* = 9.0 Hz, 1H), 5.13-5.06 (m, 1.66H), 4.40-4.34 (m, 0.66H), 4.32-4.26 (m, 1H), 2.92 (ddd, *J* = 14.0, 7.0, 5.5 Hz, 0.66H), 2.72 (dq, *J* = 7.0 Hz, 1H), 2.17-2.03 (m, 8.3H), 1.74-1.72 (m, 4.98H), 1.68-1.65 (m, 4.98H), 1.61-1.59 (m, 4.98H), 1.24-1.20 (m, 4.98H).

**<sup>13</sup>C NMR** (100 MHz, CDCl<sub>3</sub>): 141.1, 140.8, 132.0, 131.9 (2 signals), 129.3, 128.5, 128.1, 128.0, 125.5, 125.2, 124.1, 123.6, 91.3, 91.2, 83.3, 82.9, 71.9, 71.3, 39.9, 35.1, 34.3, 26.6, 25.9, 12.9, 17.2, 16.7 (only 27 signals were observed).

**HRMS** (ESI) Calcd. for C<sub>20</sub>H<sub>26</sub>ONa [M+Na]<sup>+</sup>: 305.1882, Found: 305.1876.

**FTIR** (neat): 3396, 2970, 2926, 1376, 1014 cm<sup>-1</sup>.



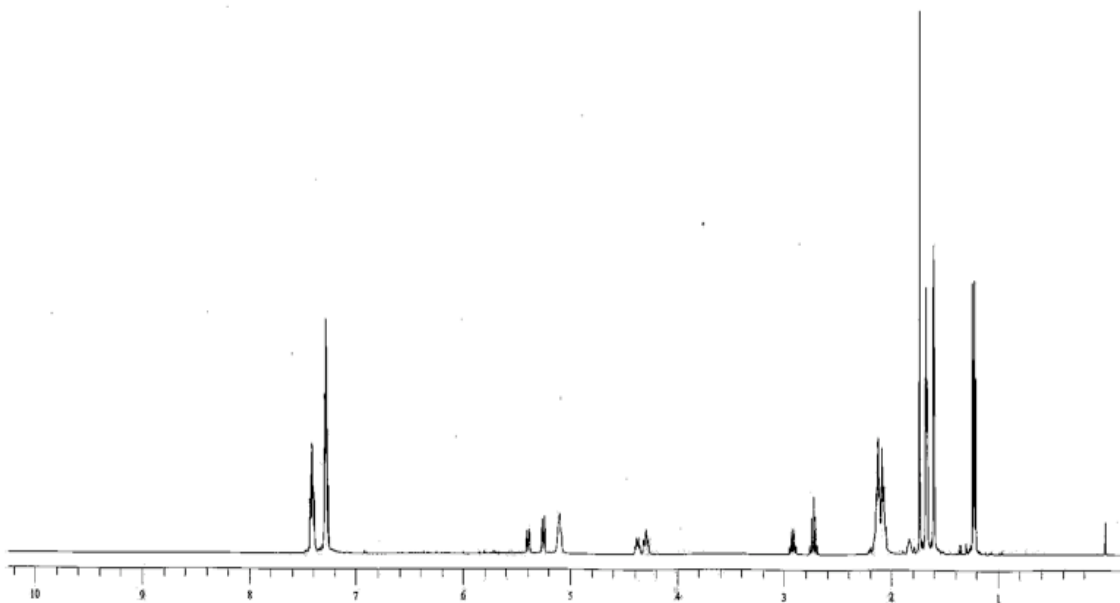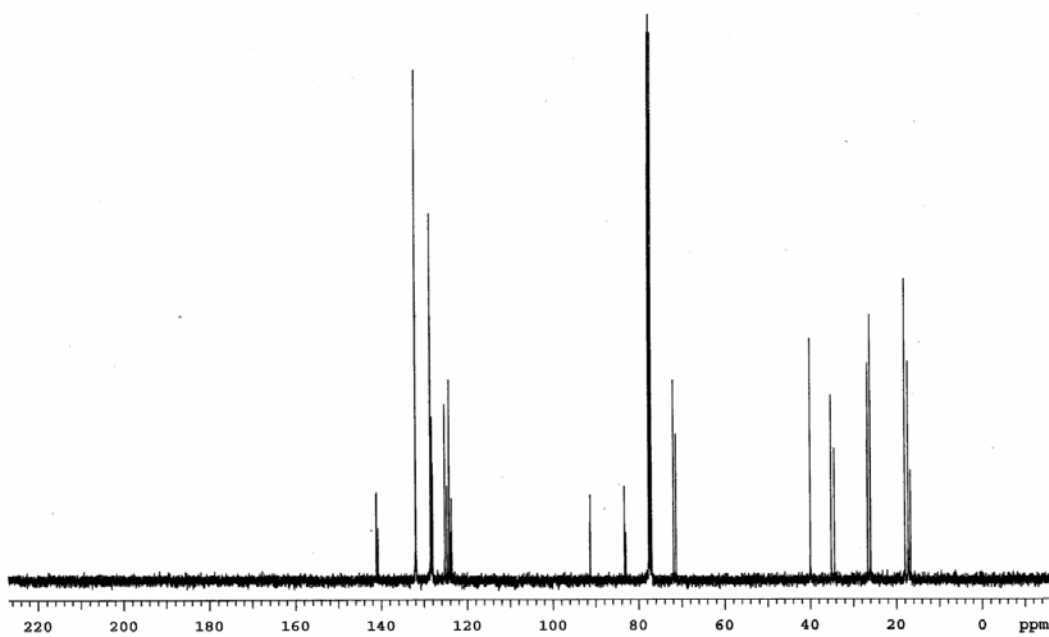

### 3-Methyl-1-phenylhept-5-en-1-yn-4-ol (3l)

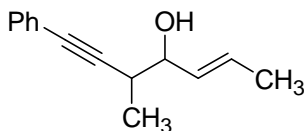

**Procedure A (via alcohol 2l):** After heating the reaction at 95 °C for 15 hours the mixture was concentrated *in vacuo* and purified by flash column chromatography (SiO<sub>2</sub>, PhMe) to afford the title compound (43 mg, 72%, 2:1 d.r.) as a pale yellow oil.

**<sup>1</sup>H NMR** (400 MHz, CDCl<sub>3</sub>): 7.45-7.36 (m, 3H), 7.36-7.26 (m, 4.5H), 5.84-5.71 (m, 1.5H), 5.66 (ddq, *J* = 15.4, 7.2, 1.7 Hz, 0.5H), 5.56 (ddq, *J* = 15.4, 7.2, 1.7 Hz, 1H), 4.10-4.02 (m, 0.5H), 4.02-3.93 (m, 1H), 2.95-2.84 (m, 0.5H), 2.82-2.71 (m, 1H), 2.15 (d, *J* = 4.4 Hz, 1H), 1.95 (d, *J* = 5.5 Hz, 0.5H), 1.78-1.71 (m, 4.5H), 1.25 (d, *J* = 6.8 Hz, 3H), 1.22 (d, *J* = 7.2 Hz, 1.5H).

**<sup>13</sup>C NMR** (100 MHz, CDCl<sub>3</sub>): 131.7, 131.6, 131.2, 130.5, 129.0 (2 signals), 128.2 (2 signals), 127.9, 127.8, 123.4, 123.2, 90.8, 90.5, 83.2, 82.9, 75.9, 75.5, 34.3, 33.7, 17.8 (2 signals), 17.1, 16.5.

**HRMS** (CI) Calcd. for C<sub>14</sub>H<sub>17</sub>O [M+H]<sup>+</sup>: 201.1279, Found: 201.1277.

**FTIR** (neat): 3402, 2973, 2935, 1599, 1490, 1443, 1377, 1015, 997, 928, 756, 692 cm<sup>-1</sup>.

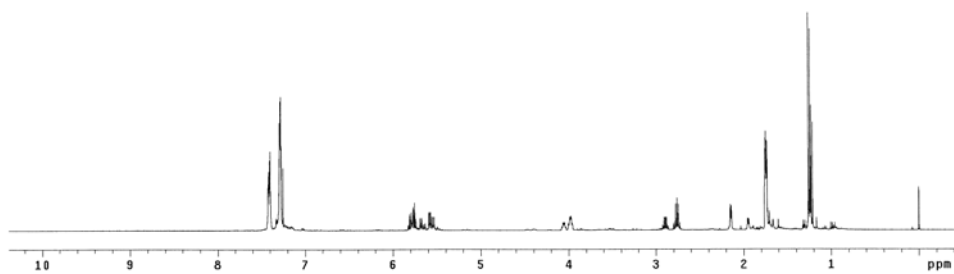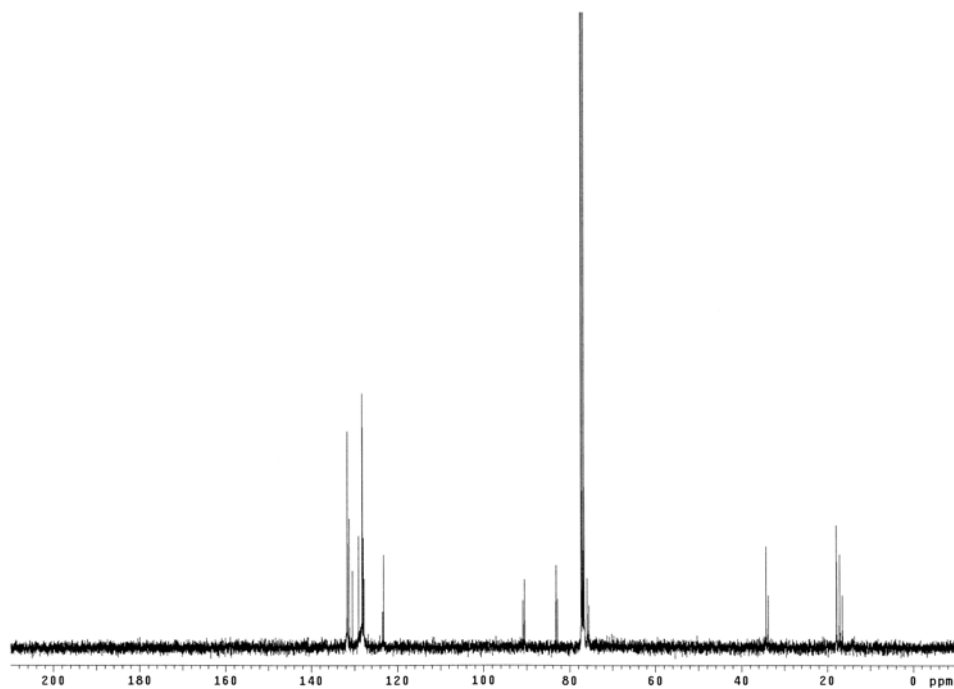

**1-Cyclopropyl-2-methyl-4-phenylbut-3-yn-1-ol (3m)**

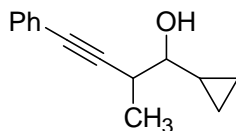

**Procedure A (via alcohol 2m):** After heating the reaction at 95 °C for 15 hours the mixture was concentrated *in vacuo* and purified by flash column chromatography (SiO<sub>2</sub>, PhMe) to afford the title compound (45 mg, 75%, 2:1 d.r.) as a pale yellow oil.

**<sup>1</sup>H NMR** (400 MHz, CDCl<sub>3</sub>): 7.46-7.38 (m, 3H), 7.35-7.24 (m, 4.5H), 3.04-2.88 (m, 2H), 2.88-2.78 (m, 1H), 2.04 (d, *J* = 5.1 Hz, 1H), 1.96 (d, *J* = 4.1 Hz, 0.5H), 1.40-1.31 (m, 4.5H), 1.19-1.03 (m, 1.5H), 0.69-0.47 (m, 3H), 0.47-0.23 (m, 3H).

**<sup>13</sup>C NMR** (100 MHz, CDCl<sub>3</sub>): 131.6 (2 signals), 128.2 (2 signals), 127.8, 127.7, 123.5, 123.3, 91.4, 90.8, 83.0, 82.6, 79.2, 78.9, 34.4, 34.0, 17.6, 16.5, 15.8, 14.7, 3.7, 3.2, 2.4, 2.0.

**HRMS** (CI) Calcd. for C<sub>14</sub>H<sub>17</sub>O [M+H]<sup>+</sup>: 201.1279, Found: 201.1282.

**FTIR** (neat): 3414, 3078, 3004, 2878, 1598, 1490, 1443, 1026, 974, 915, 865, 756, 692 cm<sup>-1</sup>.

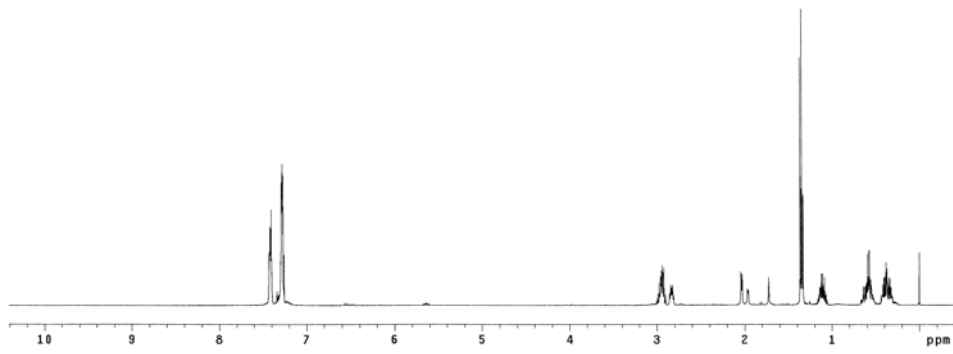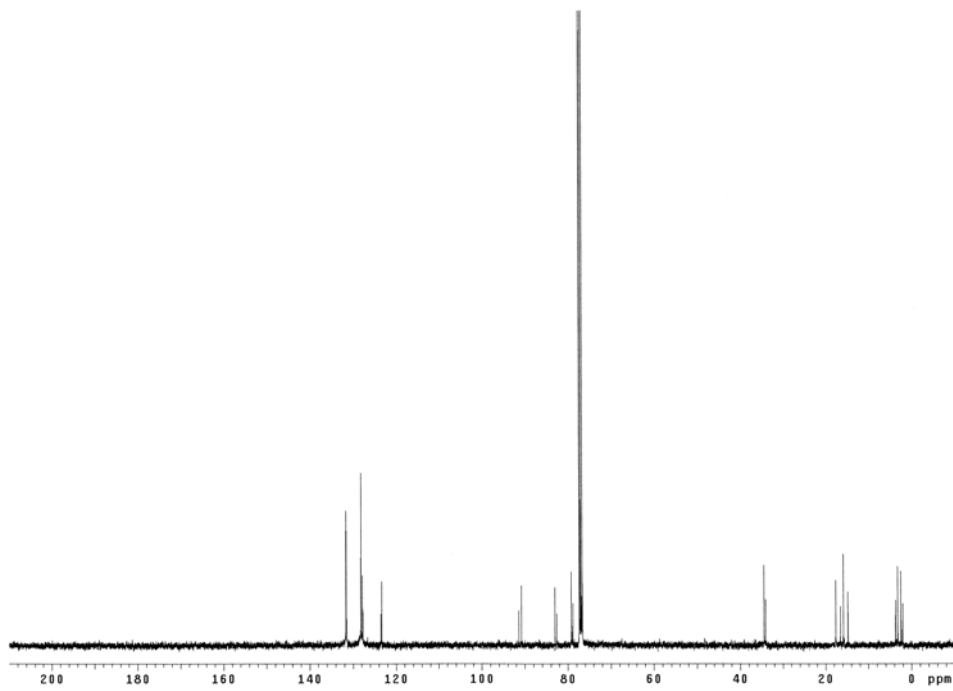

### 3-Methyl-1,5-diphenylpent-4-yn-2-ol (**3n**)<sup>4</sup>

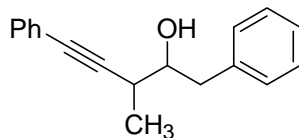

**Procedure A (via alcohol **2n**):** After heating the reaction at 95 °C for 15 hours the mixture was concentrated *in vacuo* and purified by flash column chromatography (SiO<sub>2</sub>, PhMe) to afford the title compound (53 mg, 70%, 1:1 d.r.) as a pale yellow oil.

**<sup>1</sup>H NMR** (400 MHz, CDCl<sub>3</sub>): 7.49-7.38 (m, 4H), 7.37-7.15 (m, 16H), 3.90-3.81 (m, 1H), 3.81-3.69 (m, 1H), 3.13 (dd, *J* = 13.7, 3.4 Hz, 1H), 2.99 (dd, *J* = 13.7, 6.2 Hz, 1H), 2.95-2.72 (m, 4H), 2.00-1.72 (m, 2H), 1.38-1.30 (m, 6H).

**<sup>13</sup>C NMR** (100 MHz, CDCl<sub>3</sub>): 138.3 (2 signals), 131.7, 131.6, 129.5, 129.4, 128.6, 128.5, 128.2 (2 signals), 127.9, 127.8, 126.5 (2 signals), 123.4, 123.3, 91.4, 90.0, 83.8, 83.0, 75.5, 41.8, 40.7, 33.0, 32.5, 17.4, 16.5 (only 27 signals were observed).

**HRMS** (CI) Calcd. for C<sub>18</sub>H<sub>19</sub>O [M+H]<sup>+</sup>: 251.1436, Found: 251.1436.

**FTIR** (neat): 3442, 3028, 2974, 2933, 1599, 1491, 1454, 1071, 1031, 985, 756, 693 cm<sup>-1</sup>.

*The spectroscopic properties of this compound were consistent with the data available in the literature.*<sup>4</sup>

<sup>4</sup> Ooi, T.; Kagoshima, N.; Maruoko, K. *J. Am. Chem. Soc.* **1997**, *119*, 5754.

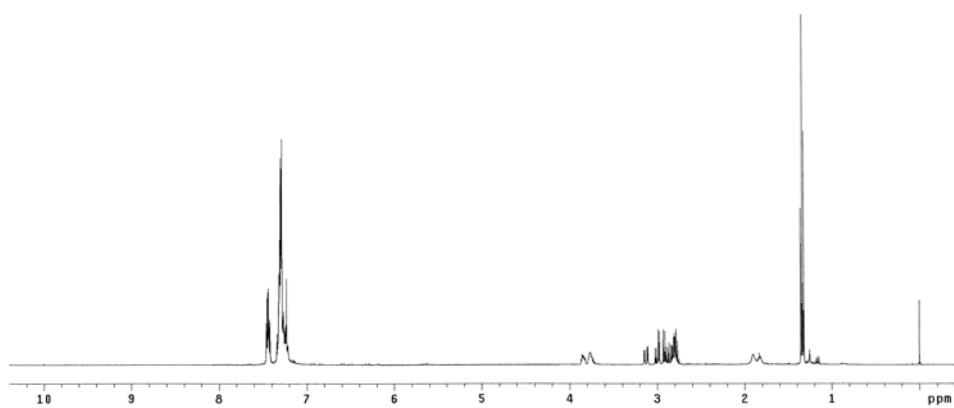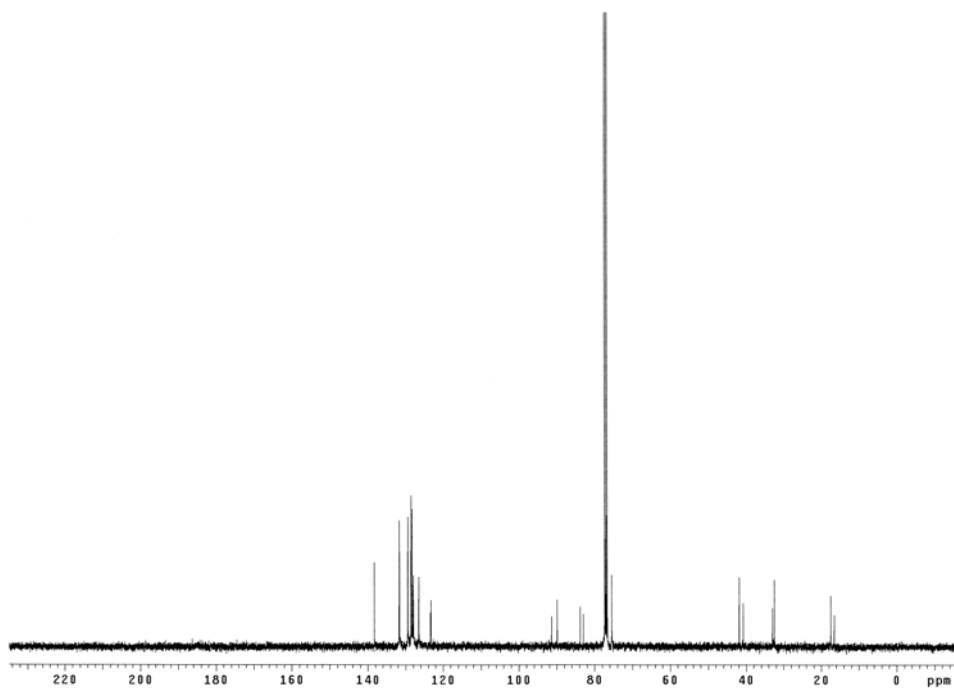

### 3-Methyl-1-phenylnon-1-yn-4-ol (3o)

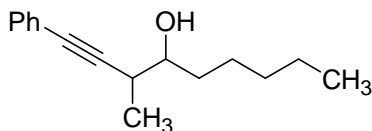

**Procedure A (via alcohol 2o):** After heating the reaction at 95 °C for 15 hours the mixture was concentrated *in vacuo* and purified by flash column chromatography (SiO<sub>2</sub>, PhMe) to afford the title compound (50 mg, 72%, 2:1 d.r.) as a pale yellow oil.

**<sup>1</sup>H NMR** (400 MHz, CDCl<sub>3</sub>): 7.43-7.38 (m, 3H), 7.36-7.23 (m, 4.5H), 3.69-3.57 (m, 0.5H), 3.57-3.44 (m, 1H), 2.87-2.71 (m, 1.5H), 1.87-1.78 (m, 1.5H), 1.69-1.45 (m, 4.5H), 1.44-1.20 (m, 12H), 0.85 (m, 4.5H).

**<sup>13</sup>C NMR** (100 MHz, CDCl<sub>3</sub>): 131.6 (2 signals), 128.5, 128.2, 127.9, 127.8, 123.4, 123.3, 91.5, 90.3, 83.3, 82.6, 74.5, 74.4, 35.2, 33.7 (2 signals), 33.6, 31.8, 25.5 (2 signals), 22.6, 17.5, 15.9, 14.0 (only 25 signals were observed).

**HRMS** (CI) Calcd. for C<sub>16</sub>H<sub>23</sub>O [M+H]<sup>+</sup>: 231.1747, Found: 231.1749.

**FTIR** (neat): 3412, 2932, 1598, 1490, 1456, 1377, 1070, 1026, 943, 913, 756, 691 cm<sup>-1</sup>.



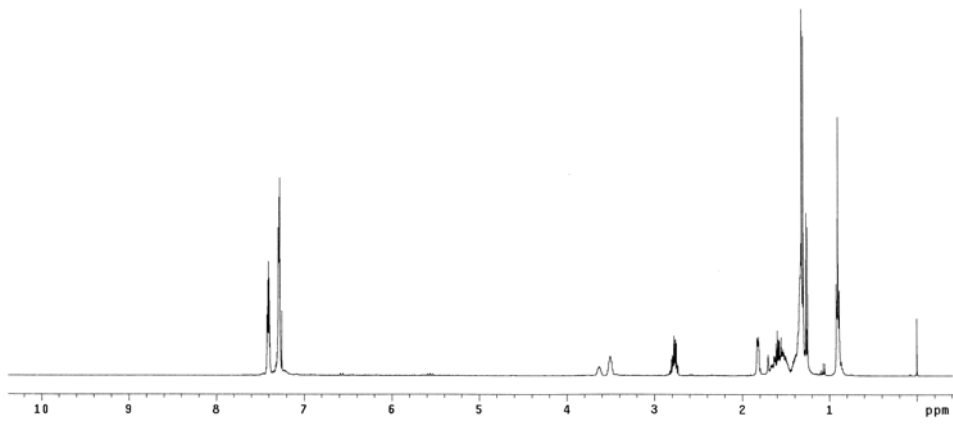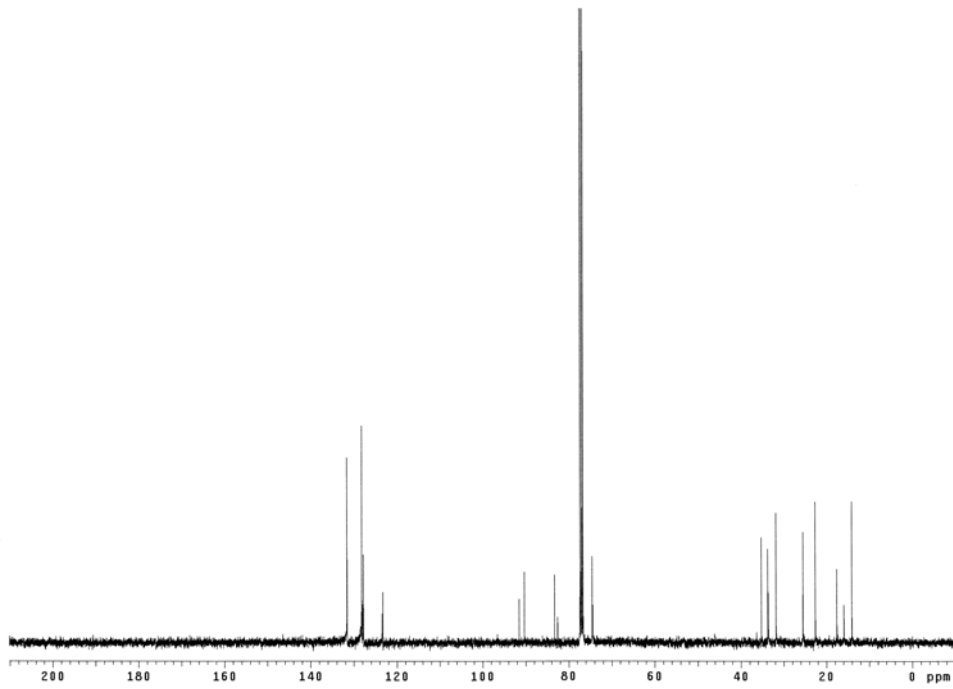

**2-Methyl-1-phenyl-4-thiophen-2-ylbut-3-yn-1-ol (3p)**

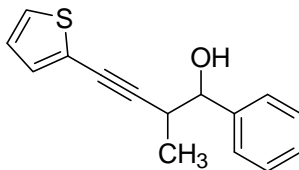

**Procedure B (via enyne 1b):** After heating the reaction at 95 °C for 15 hours the mixture was concentrated *in vacuo* and purified by flash column chromatography (SiO<sub>2</sub>, PhMe) to afford the title compound (52 mg, 71%, 1:1 d.r.) as a pale yellow oil.

**<sup>1</sup>H NMR** (400 MHz, CDCl<sub>3</sub>): 7.43-7.29 (m, 10H), 7.20-7.16 (m, 3H), 7.08 (dd, *J* = 3.4, 2.4 Hz, 1H), 6.95-6.90 (m, 2H), 4.77 (d, *J* = 3.2 Hz, 1H), 4.59 (d, *J* = 3.2 Hz, 1H), 3.09-3.00 (m, 2H), 2.57 (d, *J* = 3.2 Hz, 1H), 2.34 (d, *J* = 3.2 Hz, 1H), 1.20 (d, *J* = 6.8 Hz, 3H), 1.15 (d, *J* = 6.8 Hz, 3H).

**<sup>13</sup>C NMR** (100 MHz, CDCl<sub>3</sub>): 141.3, 131.6, 131.3, 128.3, 128.1, 128.0, 127.8, 126.8, 126.7, 126.6, 126.5 (2 signals), 126.3, 123.4, 123.2, 95.1, 94.6, 77.8, 77.5, 76.7, 76.4, 76.3, 36.2, 35.3, 17.2, 15.7.

**HRMS** (CI) Calcd. for C<sub>15</sub>H<sub>15</sub>OS [M+H]<sup>+</sup>: 243.0844, Found: 243.0847.

**FTIR** (neat): 3403, 3030, 2976, 2932, 1494, 1453, 1427, 1237, 1193, 1025, 983, 910, 840, 757, 700 cm<sup>-1</sup>.

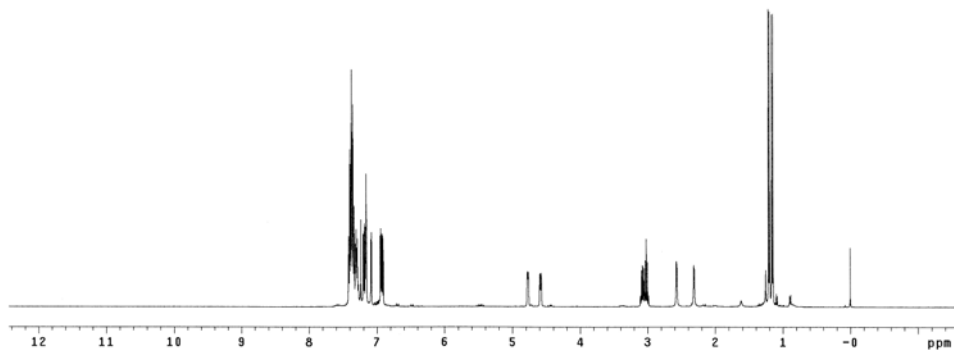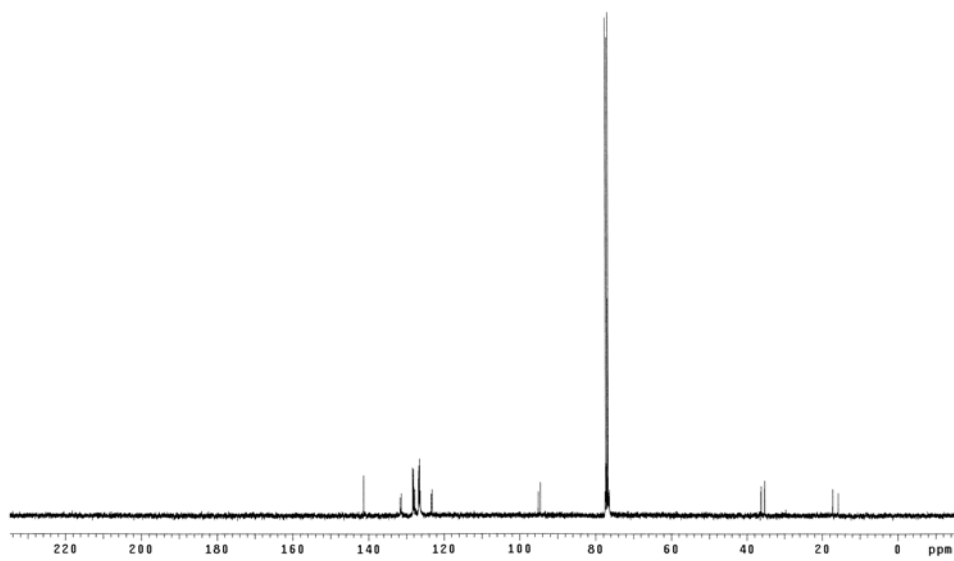

**(6-Hydroxy-5-methyl-6-phenylhex-3-ynyl)carbamic acid *tert*-butyl ester (3q)**

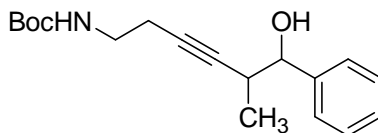

**Procedure B (via enyne 1c):** After heating the reaction at 95 °C for 15 hours the mixture was concentrated *in vacuo* and purified by flash column chromatography (SiO<sub>2</sub>, PhMe) to afford the title compound (49 mg, 54%, 1:1 d.r.) as a pale yellow oil.

**<sup>1</sup>H NMR** (400 MHz, CDCl<sub>3</sub>): 7.38-7.27 (m, 10H), 4.83-4.79 (m, 2H), 4.65 (d, *J* = 6.3 Hz, 1H), 4.46 (d, *J* = 6.8 Hz, 1H), 3.26-3.16 (m, 2H), 2.84-2.74 (m, 2H), 2.37-2.27 (m, 4H), 1.45-1.43 (m, 22H), 1.11 (d, *J* = 6.3 Hz, 3H), 1.07 (d, *J* = 6.8 Hz, 3H).

**<sup>13</sup>C NMR** (100 MHz, CDCl<sub>3</sub>): 155.8 (2 signals), 141.8 (2 signals), 128.2, 128.0 (2 signals), 127.6, 126.5, 126.2, 83.1, 82.6, 80.7, 80.2, 79.4 (2 signals), 79.3, 77.5, 39.5 (2 signals), 35.4, 34.3, 28.4 (2 signals), 20.4, 20.3, 17.7, 16.1.

**HRMS** (CI) Calcd. for C<sub>18</sub>H<sub>26</sub>NO<sub>3</sub> [M+H]<sup>+</sup>: 304.1913, Found: 304.1917.

**FTIR** (neat): 3420, 2977, 1694, 1515, 1366, 1252, 1171, 1026, 734, 701 cm<sup>-1</sup>.

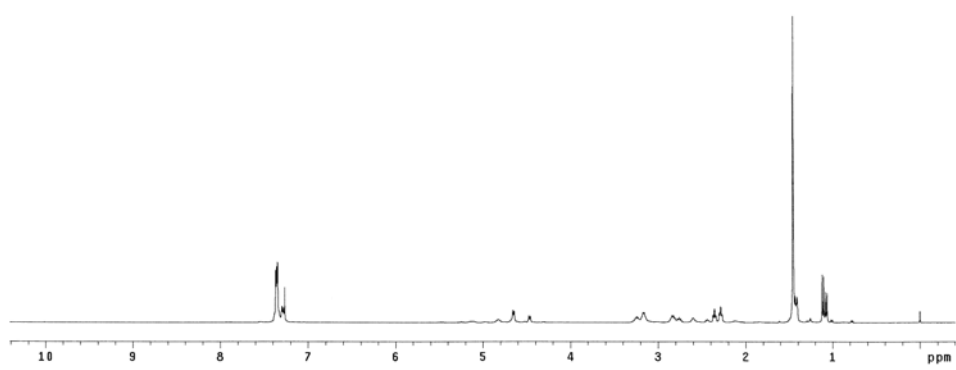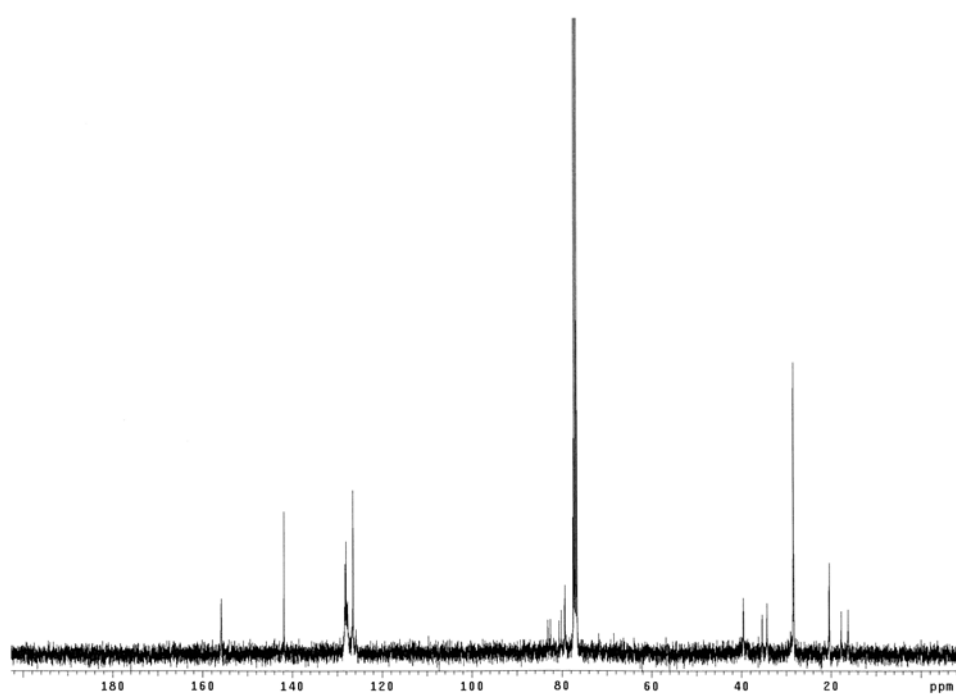

**8-(tert-Butyldimethylsilyloxy)-2-methyl-1-phenyloct-3-yn-1-ol (3r)**

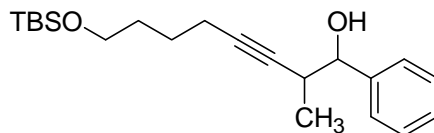

**Procedure B (via enyne 1d):** After heating the reaction at 95 °C for 15 hours the mixture was concentrated *in vacuo* and purified by flash column chromatography (SiO<sub>2</sub>, PhMe) to afford the title compound (66 mg, 63%, 1:1 d.r.) as a pale yellow oil.

**<sup>1</sup>H NMR** (400 MHz, CDCl<sub>3</sub>): 7.38-7.23 (m, 10H), 4.96 (d, *J* = 7.2, 3.8 Hz, 1H), 4.42 (d, *J* = 7.2, 3.8 Hz, 1H), 3.64-3.60 (m, 6H), 2.86-2.83 (m, 1H), 2.77-2.72 (m, 1H), 2.27-2.17 (m, 4H), 1.59-1.53 (m, 8H), 1.06 (d, *J* = 7.2 Hz, 2H), 1.05 (d, *J* = 7.2 Hz, 4H), 0.90 (s, 18H), 0.05 (s, 12H).

**<sup>13</sup>C NMR** (100 MHz, CDCl<sub>3</sub>): 141.6, 141.5, 128.3, 128.2, 127.9, 127.8, 127.5 (2 signals), 126.7, 126.6, 126.5, 125.9, 83.9, 83.1, 81.5, 80.9, 77.7, 76.4, 62.6 (2 signals), 35.6, 34.3, 31.9, 25.9, 25.4, 25.3, 18.5, 18.3, 17.8, 15.9, -5.3 (2 signals).

**HRMS** (CI) Calcd. for C<sub>21</sub>H<sub>35</sub>O<sub>2</sub>Si [M+H]<sup>+</sup>: 347.2406, Found: 347.2407.

**FTIR** (neat): 3432, 2929, 1628, 1471, 1388, 1255, 1105, 836, 776, 700 cm<sup>-1</sup>.

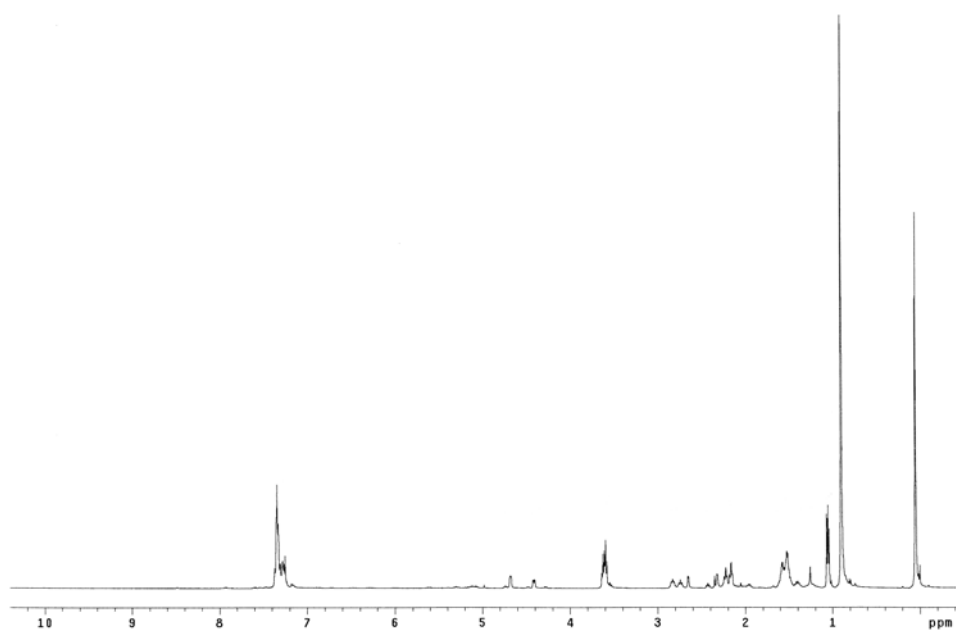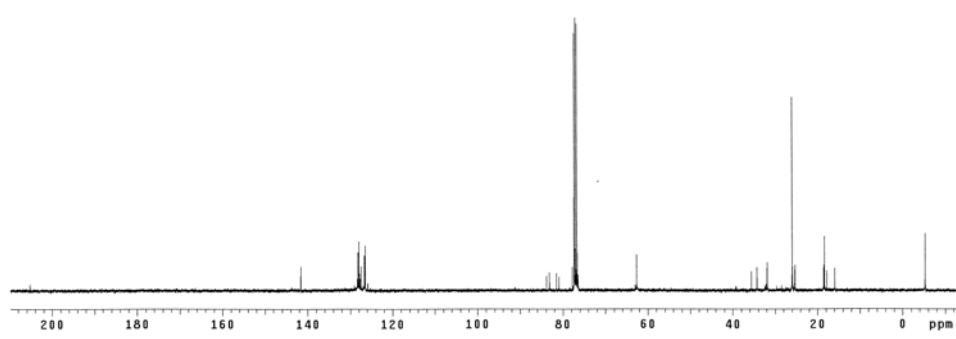

**5-(*tert*-Butyldimethylsilyloxy)-2-methyl-1-phenylpent-3-yn-1-ol (3s)**

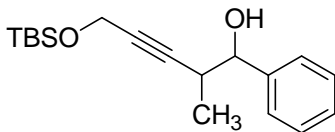

**Procedure B (via enyne 1e):** In a modification to procedure B, *m*-NO<sub>2</sub>BzOH was not employed as a cocatalyst. After heating the reaction at 95 °C for 15 hours the mixture was concentrated *in vacuo* and purified by flash column chromatography (SiO<sub>2</sub>, PhMe) to afford the title compound (71 mg, 78%, 1.5:1 d.r.) as a pale yellow oil.

**<sup>1</sup>H NMR** (400 MHz, CDCl<sub>3</sub>): 7.36-7.34 (m, 8.25H), 4.73 (d, *J* = 5.5 Hz, 1H), 4.47 (d, *J* = 7.0 Hz, 0.65H), 4.34 (d, *J* = 2.0 Hz, 1.3H), 4.28 (d, *J* = 2.0 Hz, 2H), 2.93-2.77 (m, 1.65H), 2.60 (br s, 0.65H), 2.29 (br s, 1H), 1.10 (d, *J* = 7.0 Hz, 3H), 1.07 (d, *J* = 7.0 Hz, 1.95H), 0.92-0.88 (m, 14.85H), 0.12 (s, 3.9H), 0.09 (s, 6H).

**<sup>13</sup>C NMR** (100 MHz, CDCl<sub>3</sub>): 141.3, 128.3, 128.1, 127.9, 127.6, 127.4, 126.9, 126.7, 126.4, 125.8, 86.3, 85.8, 82.1, 81.5, 77.5, 76.1, 51.8, 35.5, 34.3, 25.9, 25.8, 18.3, 17.3, 15.3, -5.1, -5.2.

**HRMS** (CI) Calcd. for C<sub>18</sub>H<sub>29</sub>O<sub>2</sub>Si [M+H]<sup>+</sup>: 305.1937, Found: 305.1940.

**FTIR** (neat): 3446, 2929, 2857, 1472, 1255, 1083, 837, 778, 700, 435 cm<sup>-1</sup>.



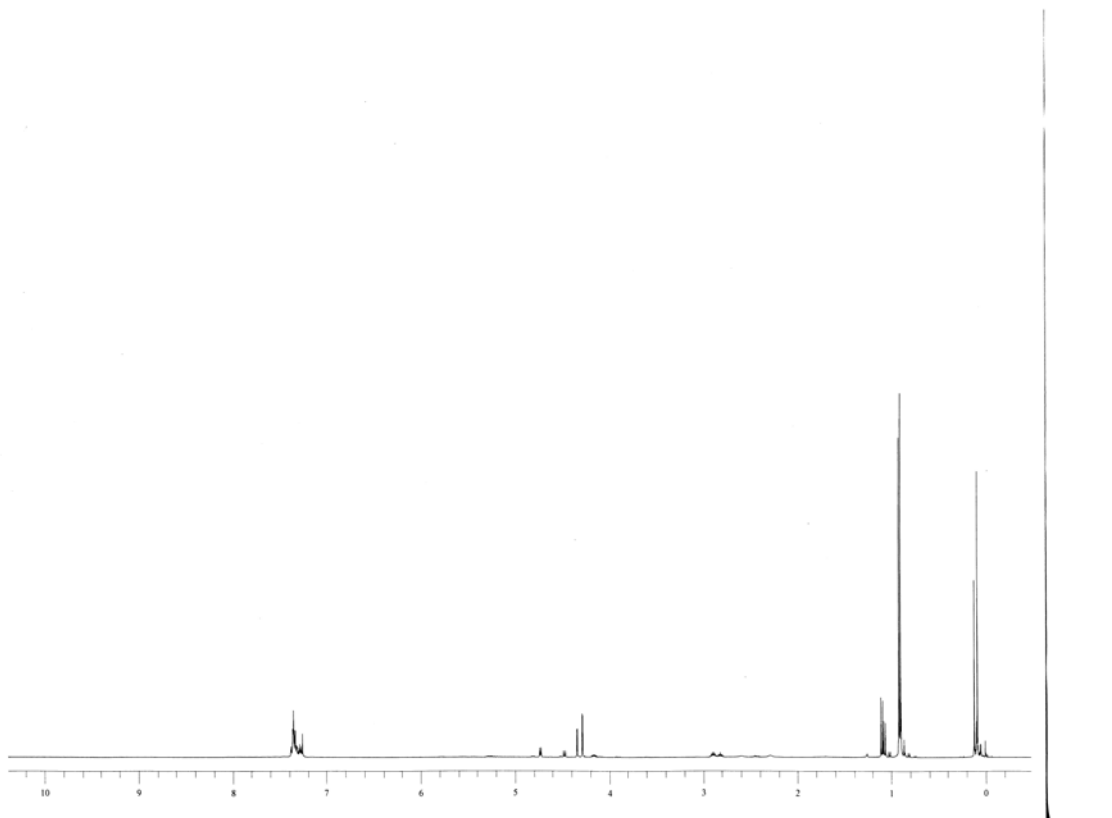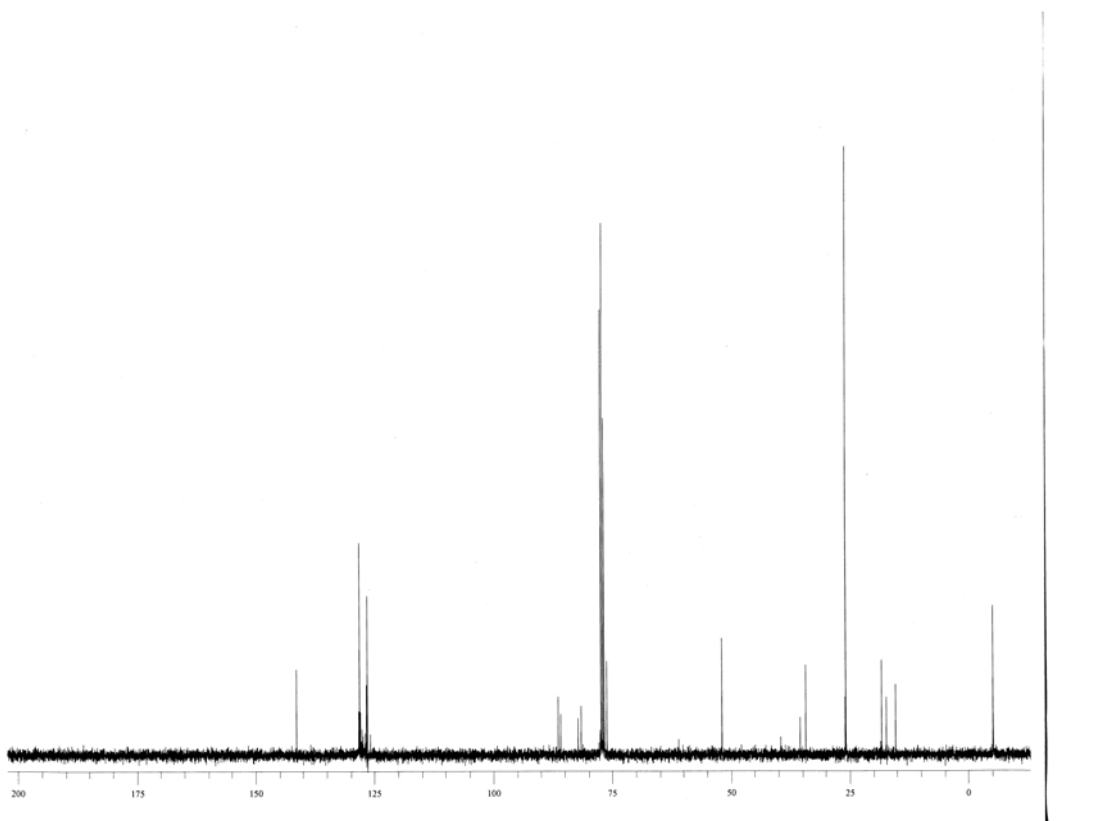

**5-(*tert*-Butyldimethylsilyloxy)-2,5-dimethyl-1-phenylhex-3-yn-1-ol (3t)**

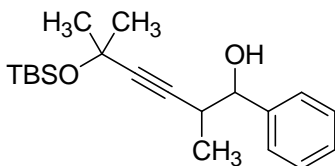

**Procedure B (via enyne 1f):** After heating the reaction at 95 °C for 15 hours the mixture was concentrated *in vacuo* and purified by flash column chromatography (SiO<sub>2</sub>, PhMe) to afford the title compound (56 mg, 56%, 1:1 d.r.) as a pale yellow oil.

**<sup>1</sup>H NMR** (400 MHz, CDCl<sub>3</sub>): 7.41-7.24 (m, 10H), 4.68 (dd, *J* = 7.2, 3.76 Hz, 1H), 4.47 (dd, *J* = 7.2, 3.8 Hz, 1H), 2.88-2.56 (m, 2H), 2.49 (d, *J* = 3.8 Hz, 1H), 2.14 (d, *J* = 3.8 Hz, 1H), 1.46 (s, 3H), 1.45 (s, 3H), 1.38 (s, 3H), 1.37 (s, 3H), 1.12 (d, *J* = 7.2 Hz, 3H), 1.08 (d, *J* = 7.2 Hz, 3H), 0.86 (s, 9H), 0.84 (s, 9H), 0.15 (s, 3H), 0.13 (s, 3H), 0.10 (s, 3H), 0.09 (s, 3H).

**<sup>13</sup>C NMR** (100 MHz, CDCl<sub>3</sub>): 141.5 (2 signals), 128.2, 128.0, 127.7, 127.5, 126.8, 126.5, 90.2, 88.7, 83.5, 83.2, 77.5 (2 signals), 66.3 (2 signals), 34.7, 34.3, 33.3, 33.1, 33.0, 25.7 (2 signals), 17.9, 17.1, 15.7, -2.7 (2 signals).

**HRMS** (CI) Calcd. for C<sub>20</sub>H<sub>33</sub>O<sub>2</sub>Si [M+H]<sup>+</sup>: 333.2250, Found: 333.2249.

**FTIR** (neat): 3391, 2930, 2889, 2857, 1462, 1376, 1360, 1248, 1161, 1039, 905, 837, 810, 776, 700 cm<sup>-1</sup>.

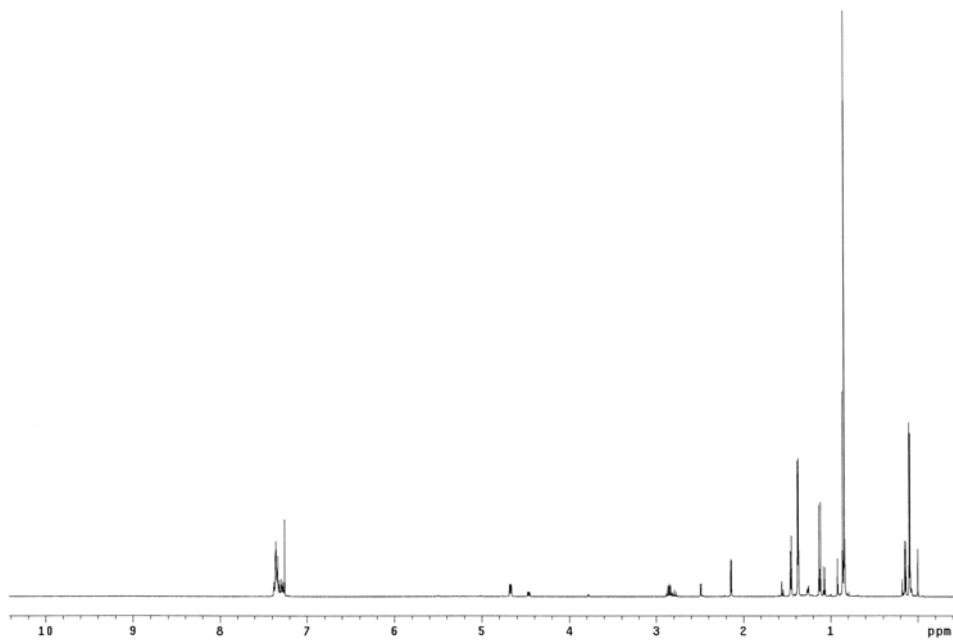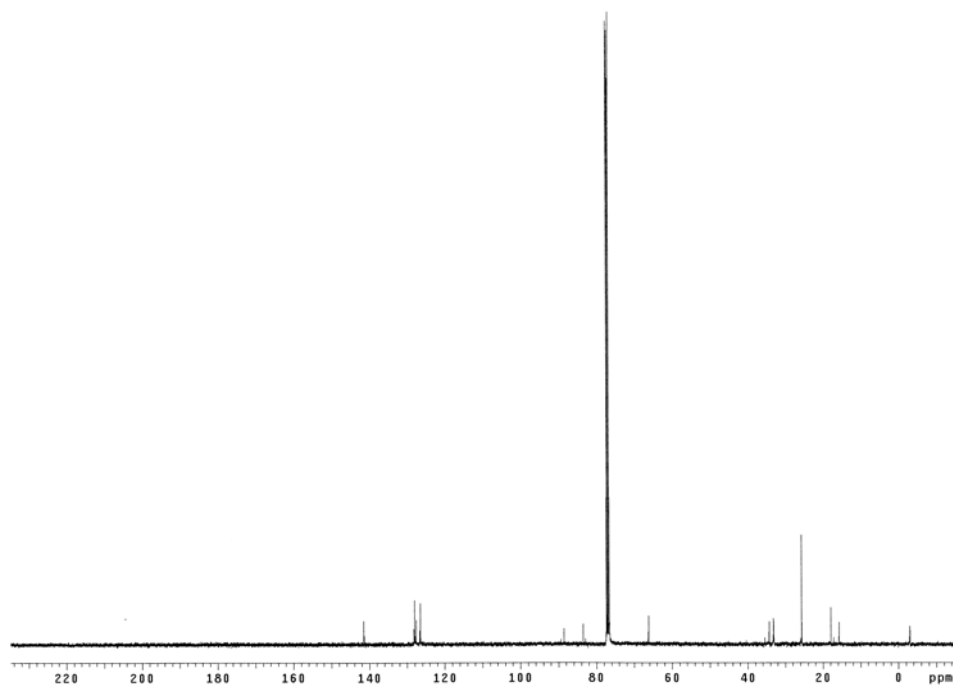

#### 4-Cyclohexyl-2-methyl-1-phenylbut-3-yn-1-ol (3u)

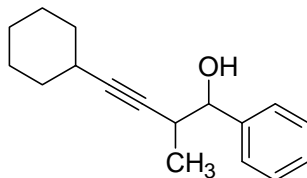

**Procedure B (via enyne 1g):** After heating the reaction at 95 °C for 21 hours the mixture was concentrated *in vacuo* and purified by flash column chromatography (SiO<sub>2</sub>, PhMe) to afford the title compound (51 mg, 70%, 1:1 d.r.) as a yellow oil.

**<sup>1</sup>H NMR** (400 MHz, CDCl<sub>3</sub>): 7.38-7.24 (m, 10H), 4.67 (dd, *J* = 5.0, 3.5 Hz, 1H), 4.41 (dd, *J* = 7.0, 3.5 Hz, 1H), 2.88-2.80 (m, 1H), 2.75 (ddd, *J* = 7.0, 7.0, 2.0 Hz, 1H), 2.68 (d, *J* = 3.5 Hz, 1H), 2.42-2.28 (m, 3H), 1.82-1.21 (m, 20H), 1.05 (app. d, *J* = 7.0 Hz, 6H).

**<sup>13</sup>C NMR** (100 MHz, CDCl<sub>3</sub>): 141.9, 141.8, 128.4, 128.1, 128.0, 127.7, 127.0, 126.8, 88.8, 88.0, 81.4, 80.8, 78.0, 76.7, 36.0, 34.6, 33.2, 33.1 (2 signals), 29.3, 29.2, 26.1, 25.1, 25.0, 18.1, 16.3.

**HRMS** (CI) Calcd. for C<sub>17</sub>H<sub>23</sub>O [M+H]<sup>+</sup>: 243.1749, Found: 243.1749.

**FTIR** (neat): 3432, 2927, 2853, 1449, 1025 cm<sup>-1</sup>.

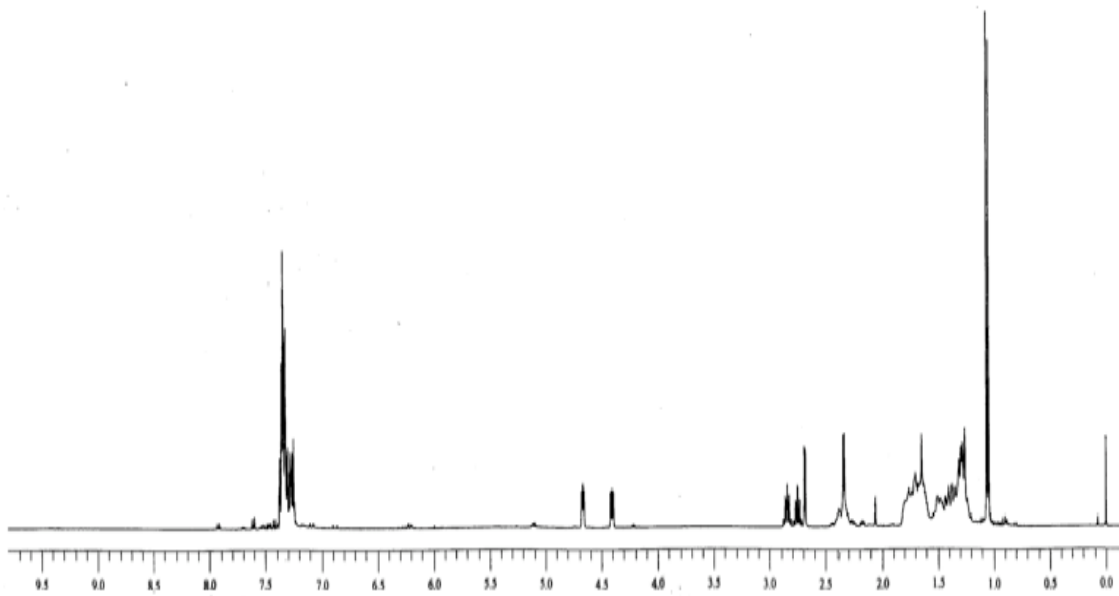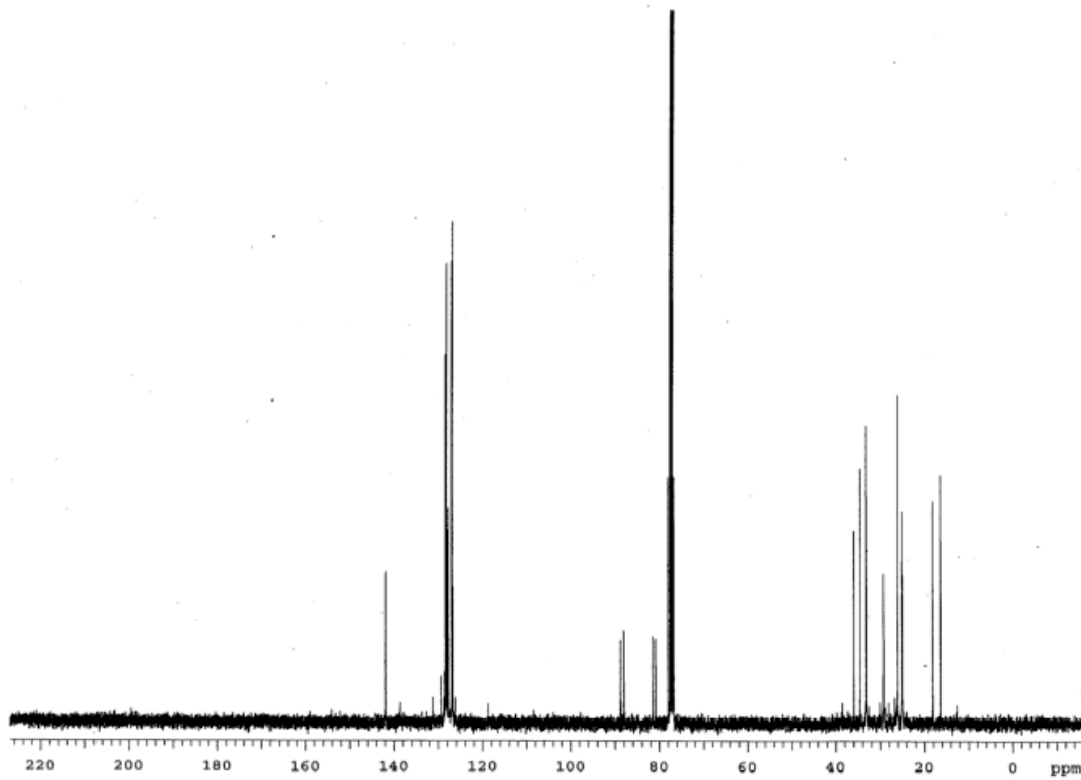

## Procedures for the Propargylation of 4a-4c Employing Isopropanol as Reductant

### 2-Methyl-1-(4-nitrophenyl)-4-phenylbut-3-yn-1-ol (3a)

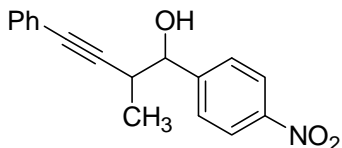

**Procedure C (via aldehyde 4a):** After heating the reaction at 90 °C for 18 hours the mixture was concentrated *in vacuo* and purified by flash column chromatography (SiO<sub>2</sub>, PhMe) to afford the title compound (51 mg, 61%, 1:1 d.r.) as a pale yellow oil.

*The spectroscopic properties of this compound were identical to those reported earlier.*

This material was contaminated with *ca.* 10 % of material resulting from *cis*-reduction of the alkyne moiety (1:1 d.r.); characteristic signals for <sup>1</sup>H NMR (400 MHz, CDCl<sub>3</sub>): 6.65 (d, *J* = 11.5 Hz, 1H), 6.43 (d, *J* = 11.5 Hz, 1H), 5.56 (dd, *J* = 11.5, 10.5 Hz, 1H), 5.47 (dd, *J* = 11.5, 10.5 Hz, 1H), 1.10 (d, *J* = 6.5 Hz, 3H), 0.95 (d, *J* = 6.5 Hz, 3H). *The structural assignment of this byproduct was made by analogy with the material derived from the analogous reaction with benzaldehyde (see below).*

## 2-Methyl-1,4-diphenyl-but-3-yn-1-ol (3b)

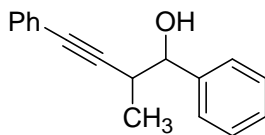

**Procedure C (via aldehyde 4b):** After heating the reaction at 90 °C for 17 hours the mixture was concentrated *in vacuo* and purified by flash column chromatography (SiO<sub>2</sub>, PhMe) to afford the title compound (52 mg, 74%, 1:1 d.r.) as a pale yellow oil.

*The spectroscopic properties of this compound were identical to those reported earlier.*

This material was contaminated with *ca.* 10 % of material resulting from *cis*-reduction of the alkyne moiety (1:1 d.r.); characteristic signals for <sup>1</sup>H NMR (400 MHz, CDCl<sub>3</sub>): 6.63 (d, *J* = 11.5 Hz, 1H), 6.39 (d, *J* = 11.5 Hz, 1H), 5.59 (dd, *J* = 11.5, 10.5 Hz, 1H), 5.50 (dd, *J* = 11.5, 10.5 Hz, 1H), 1.08 (d, *J* = 6.5 Hz, 3H), 0.86 (d, *J* = 6.5 Hz, 3H).

*The spectroscopic properties of this compound were consistent with the data reported in the literature.*<sup>5</sup>

---

<sup>5</sup> G. Y. Fang, V. K. Aggarwal, *Angew. Chem.* **2007**, *119*, 363-366; *Angew. Chem. Int. Ed.* **2007**, *46*, 359-362.

**1-(4-Methoxyphenyl)-2-methyl-4-phenylbut-3-yn-1-ol (3c)**

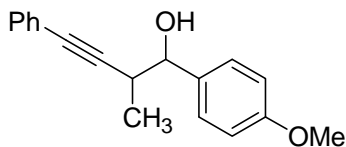

**Procedure C (via aldehyde 4c):** After heating the reaction at 90 °C for 15 hours the mixture was concentrated *in vacuo* and purified by flash column chromatography (SiO<sub>2</sub>, PhMe) to afford the title compound (73 mg, 91%, 1:1 d.r.) as a pale yellow oil. No significant reduction of the alkyne moiety was observed.

*The spectroscopic properties of this compound were identical to those reported earlier.*



## Experimental Details for Mechanistic Studies

### *deuterio- 2-Methyl-1,4-diphenylbut-3-yn-1-ol (deuterio-3b)*

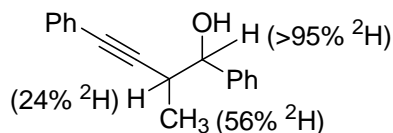

**Procedure A (via alcohol *deuterio-2b*):** d<sub>2</sub>-benzyl alcohol (*deuterio-2b*, 98% deuterium incorporation) was purchased from Aldrich. After heating the reaction at 95 °C for 23 hours the mixture was concentrated *in vacuo* and purified by flash column chromatography (SiO<sub>2</sub>, PhMe) to afford the title compound (55 mg, 78%, 2:1 d.r.) as a pale yellow oil.

**<sup>2</sup>H NMR** (77 MHz, CHCl<sub>3</sub>): 4.90-4.46 (m, 1.00<sup>2</sup>H), 3.15-2.95 (m, 0.24<sup>2</sup>H), 1.04-1.00 (m, 0.56<sup>2</sup>H).

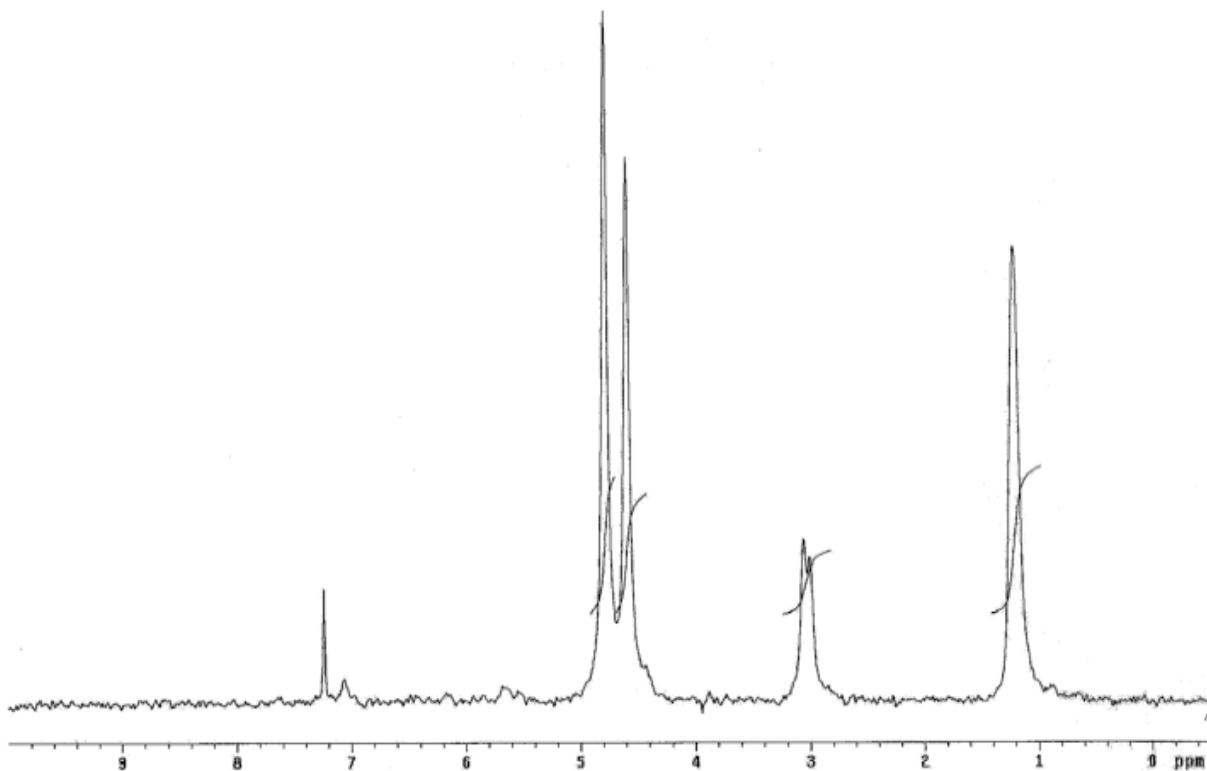

Supplement: NIHMS195850-supplement-Supplementary_Data.pdf [file NIHMS195850-supplement-Supplementary_Data.pdf]
